# Supplementary material for: Genome Identification of B-BOX Gene Family Members in Seven Rosaceae Species and Their Expression Analysis in Response to Flower Induction in Malus domestica
Source: PubMed Central journal article supplement (PMC6100437; doi:10.3390/molecules23071763), 2018-07-18
Supplement: molecules-23-01763-s001.pdf [file molecules-23-01763-s001.pdf]

**Table S1:** Nomenclature, Identification, chromosomal location, CDS and peptide length and weight of BBX gene family in seven Rosacea species.

| Name    | Gene Id       | Location                 | CDS  | Molecular weight(KD) | Peptide |
|---------|---------------|--------------------------|------|----------------------|---------|
| MdBBX1  | MDP0000202669 | chr1:26862700..26863811  | 1023 | 38.14                | 340     |
| MdBBX2  | MDP0000294359 | chr2:19905176..19906517  | 1224 | 44.10                | 407     |
| MdBBX3  | MDP0000172036 | chr3:28997567..28999608  | 450  | 16.32                | 149     |
| MdBBX4  | MDP0000820175 | chr3:31899712..31900798  | 375  | 13.83                | 124     |
| MdBBX5  | MDP0000315396 | chr3:33580850..33589540  | 780  | 29.71                | 259     |
| MdBBX6  | MDP0000316084 | chr3:33595541..33598751  | 804  | 30.46                | 267     |
| MdBBX7  | MDP0000289278 | chr5:2765013..2765447    | 435  | 15.89                | 144     |
| MdBBX8  | MDP0000939920 | chr5:2779394..2779828    | 435  | 15.89                | 144     |
| MdBBX9  | MDP0000761905 | chr5:2792867..2793301    | 435  | 15.89                | 144     |
| MdBBX10 | MDP0000598183 | chr5:5786734..5786946    | 213  | 7.69                 | 70      |
| MdBBX11 | MDP0000280947 | chr5:20737133..20745836  | 2577 | 94.70                | 858     |
| MdBBX12 | MDP0000140460 | chr5:20744637..20745869  | 546  | 20.25                | 181     |
| MdBBX13 | MDP0000733075 | chr6:16920878..16921438  | 561  | 20.68                | 186     |
| MdBBX14 | MDP0000271388 | chr6:22904175..22906599  | 1341 | 49.54                | 446     |
| MdBBX15 | MDP0000283949 | chr7:11349283..11353918  | 1458 | 53.05                | 485     |
| MdBBX16 | MDP0000242475 | chr7:14787088..14787441  | 354  | 12.80                | 117     |
| MdBBX17 | MDP0000264228 | chr7:25836126..25837798  | 1374 | 49.79                | 457     |
| MdBBX18 | MDP0000264845 | chr7:25837817..25839485  | 1443 | 52.27                | 480     |
| MdBBX19 | MDP0000551876 | chr8:1381940..1386799    | 1335 | 49.06                | 444     |
| MdBBX20 | MDP0000297093 | chr9:4850373..4852477    | 1179 | 43.56                | 392     |
| MdBBX21 | MDP0000194889 | chr9:6486783..6487555    | 693  | 24.71                | 230     |
| MdBBX22 | MDP0000198531 | chr9:6495007..6495595    | 558  | 20.07                | 185     |
| MdBBX23 | MDP0000232355 | chr9:6833588..6836630    | 1371 | 49.64                | 456     |
| MdBBX24 | MDP0000177126 | chr9:9619025..9620952    | 1248 | 40.52                | 415     |
| MdBBX25 | MDP0000587860 | chr9:12133412..12133600  | 189  | 6.74                 | 62      |
| MdBBX26 | MDP0000222881 | chr9:24121313..24122788  | 990  | 35.22                | 329     |
| MdBBX27 | MDP0000800387 | chr10:10605557..10606492 | 627  | 23.26                | 208     |
| MdBBX28 | MDP0000901915 | chr11:33378342..33379421 | 1080 | 39.41                | 359     |
| MdBBX29 | MDP0000208320 | chr11:33997775..34000066 | 996  | 36.57                | 331     |
| MdBBX30 | MDP0000915501 | chr12:21541142..21542428 | 909  | 33.25                | 302     |
| MdBBX31 | MDP0000383112 | chr13:2085719..2086194   | 192  | 7.10                 | 63      |
| MdBBX32 | MDP0000131980 | chr13:2544446..2546146   | 1365 | 50.48                | 454     |
| MdBBX33 | MDP0000314259 | chr13:2562817..2564517   | 1365 | 50.48                | 454     |
| MdBBX34 | MDP0000247810 | chr13:2563965..2564201   | 237  | 8.57                 | 78      |
| MdBBX35 | MDP0000458656 | chr13:2569771..2570873   | 558  | 20.55                | 185     |
| MdBBX36 | MDP0000697407 | chr13:3060206..3061697   | 906  | 32.35                | 301     |
| MdBBX37 | MDP0000302297 | chr13:8847122..8862470   | 2772 | 101.43               | 923     |
| MdBBX38 | MDP0000565292 | chr13:15864540..15876017 | 1980 | 71.94                | 659     |
| MdBBX39 | MDP0000151848 | chr13:33621832..33624451 | 759  | 27.98                | 252     |

|         |               |                                 |      |       |     |
|---------|---------------|---------------------------------|------|-------|-----|
| MdBBX40 | MDP0000157816 | chr14:9991925..9992740          | 816  | 29.64 | 271 |
| MdBBX41 | MDP0000273201 | chr14:27661064..27667646        | 2220 | 83.53 | 741 |
| MdBBX42 | MDP0000298575 | chr16:774671..782658            | 2307 | 86.28 | 768 |
| MdBBX43 | MDP0000321380 | chr16:1224658..1229786          | 1752 | 64.67 | 583 |
| MdBBX44 | MDP0000185616 | chr16:1224811..1226412          | 1362 | 50.29 | 453 |
| MdBBX45 | MDP0000713113 | chr16:20659246..20667253        | 1404 | 50.37 | 467 |
| MdBBX46 | MDP0000140484 | chr17:5396728..5398846          | 1182 | 43.56 | 393 |
| MdBBX47 | MDP0000298635 | chr17:5396890..5398976          | 1182 | 43.56 | 393 |
| MdBBX48 | MDP0000241871 | chr17:5399009..5401138          | 828  | 30.91 | 275 |
| MdBBX49 | MDP0000321180 | chr17:6874441..6877832          | 945  | 34.65 | 314 |
| MDBBX50 | MDP0000198072 | chr17:6874660..6875470          | 729  | 26.37 | 242 |
| MdBBX51 | MDP0000782323 | chr17:9847401..9849311          | 1230 | 44.49 | 409 |
| MdBBX52 | MDP0000759984 | chr17:12792679..12793491        | 813  | 29.42 | 270 |
| MdBBX53 | MDP0000398010 | chr17:20057435..20058249        | 603  | 21.97 | 200 |
| MdBBX54 | MDP0000128008 | unanchored:7356965..7358489     | 609  | 22.77 | 202 |
| MdBBX55 | MDP0000664576 | unanchored:12855188..12856983   | 732  | 26.66 | 243 |
| MdBBX56 | MDP0000321735 | unanchored:12861348..12862789   | 561  | 20.48 | 187 |
| MdBBX57 | MDP0000189746 | unanchored:24652531..24654252   | 1371 | 50.30 | 456 |
| MdBBX58 | MDP0000127949 | unanchored:30937667..30939034   | 1062 | 38.78 | 353 |
| MdBBX59 | MDP0000232445 | unanchored:34963592..34966330   | 900  | 32.93 | 299 |
| MdBBX60 | MDP0000313949 | unanchored:63077159..63081560   | 1920 | 72.36 | 639 |
| MdBBX61 | MDP0000686172 | unanchored:64578669..64579103   | 435  | 15.89 | 144 |
| MdBBX62 | MDP0000128581 | unanchored:66464234..66465313   | 1080 | 39.41 | 359 |
| MdBBX63 | MDP0000244238 | unanchored:66464516..66465595   | 1080 | 39.41 | 359 |
| MdBBX64 | MDP0000272743 | unanchored:74236542..74238208   | 1368 | 49.59 | 455 |
| MdBBX65 | MDP0000488955 | unanchored:76682982..76683170   | 189  | 6.70  | 62  |
| MdBBX66 | MDP0000697109 | unanchored:100056446..100056917 | 237  | 8.35  | 78  |
| MdBBX67 | MDP0000122414 | unanchored:116968393..116968930 | 366  | 12.55 | 121 |

(Pear, *Pyrus communis*)

|         |             |                              |      |       |     |
|---------|-------------|------------------------------|------|-------|-----|
| PcBBX1  | PCP009714.1 | scaffold00007:169646..171470 | 1356 | 49.37 | 452 |
| PcBBX2  | PCP043963.1 | scaffold00007:519721..521820 | 1398 | 51.07 | 466 |
| PcBBX3  | PCP016214.1 | scaffold00011:692760..694164 | 1020 | 38.73 | 340 |
| PcBBX4  | PCP035867.1 | scaffold00014:563819..564244 | 423  | 15.92 | 141 |
| PcBBX5  | PCP005095.1 | scaffold00024:549462..550506 | 810  | 29.32 | 270 |
| PcBBX6  | PCP022591.1 | scaffold00035:232464..233907 | 906  | 33.34 | 302 |
| PcBBX7  | PCP014647.1 | scaffold00070:241159..249737 | 504  | 18.25 | 168 |
| PcBBX8  | PCP024261.1 | scaffold00076:130476..133225 | 1161 | 42.36 | 387 |
| PcBBX9  | PCP036200.1 | scaffold00095:68171..76508   | 2784 | 101.6 | 928 |
| PcBBX10 | PCP011581.1 | scaffold00128:258610..260887 | 1194 | 44.38 | 398 |
| PcBBX11 | PCP030625.1 | scaffold00180:63246..66485   | 393  | 13.10 | 131 |
| PcBBX12 | PCP030637.1 | scaffold00180:214739..216317 | 870  | 31.94 | 290 |
| PcBBX13 | PCP005365.1 | scaffold00204:137886..139947 | 603  | 22.89 | 201 |
| PcBBX14 | PCP005445.1 | scaffold00264:269670..275747 | 1932 | 72.89 | 644 |

|         |             |                              |      |       |      |
|---------|-------------|------------------------------|------|-------|------|
| PcBBX15 | PCP016580.1 | scaffold00271:22086..23080   | 744  | 26.03 | 248  |
| PcBBX16 | PCP042842.1 | scaffold00317:112198..114125 | 1245 | 45.99 | 415  |
| PcBBX17 | PCP005533.1 | scaffold00364:92726..95120   | 1074 | 39.06 | 358  |
| PcBBX18 | PCP033159.1 | scaffold00365:188908..191817 | 1374 | 50.82 | 458  |
| PcBBX19 | PCP016741.1 | scaffold00411:124538..125217 | 441  | 16.47 | 147  |
| PcBBX20 | PCP018295.1 | scaffold00452:206496..207931 | 903  | 32.93 | 301  |
| PcBBX21 | PCP039894.1 | scaffold00467:78987..81027   | 666  | 24.88 | 222  |
| PcBBX22 | PCP021617.1 | scaffold00594:143726..146870 | 780  | 27.59 | 260  |
| PcBBX23 | PCP023237.1 | scaffold00635:23866..29654   | 1245 | 45.47 | 415  |
| PcBBX24 | PCP044704.1 | scaffold00702:47152..50034   | 891  | 32.21 | 297  |
| PcBBX25 | PCP028057.1 | scaffold00738:58516..63937   | 1689 | 61.37 | 563  |
| PcBBX26 | PCP012120.1 | scaffold00748:102457..103657 | 813  | 29.73 | 271  |
| PcBBX27 | PCP007365.1 | scaffold00765:1816..2690     | 738  | 26.42 | 246  |
| PcBBX28 | PCP015430.1 | scaffold00990:92630..93637   | 564  | 21.85 | 188  |
| PcBBX29 | PCP009084.1 | scaffold01146:64216..65974   | 1230 | 44.98 | 410  |
| PcBBX30 | PCP010729.1 | scaffold01267:21807..27157   | 720  | 25.79 | 240  |
| PcBBX31 | PCP017205.1 | scaffold01311:34630..35897   | 1020 | 37.49 | 340  |
| PcBBX32 | PCP028298.1 | scaffold01398:71203..78157   | 615  | 22.81 | 205  |
| PcBBX33 | PCP014014.1 | scaffold01509:68826..74781   | 1293 | 48.10 | 431  |
| PcBBX34 | PCP022040.1 | scaffold01674:47276..48600   | 1008 | 36.11 | 336  |
| PcBBX35 | PCP035132.1 | scaffold01811:37244..38937   | 1323 | 49.13 | 441  |
| PcBBX36 | PCP026940.1 | scaffold02017:12727..25097   | 3273 | 121.1 | 1091 |
| PcBBX37 | PCP025314.1 | scaffold02096:136..1889      | 1362 | 50.17 | 454  |
| PcBBX38 | PCP045197.1 | scaffold05997:857..2571      | 597  | 21.90 | 199  |
| PcBBX39 | PCP022283.1 | scaffold07834:1367..3297     | 726  | 26.88 | 242  |
| PcBBX40 | PCP040624.1 | scaffold17349:177..2057      | 921  | 33.13 | 307  |

*Rosa Chinesis (Rose)*

|         |             |                          |      |       |     |
|---------|-------------|--------------------------|------|-------|-----|
| RcBBX1  | RC0G0003800 | Chr00:350774..354991     | 1251 | 45.19 | 417 |
| RcBBX2  | RC0G0110200 | Chr00:13204519..13205726 | 1074 | 39.09 | 358 |
| RcBBX3  | RC0G0138600 | Chr00:17414184..17416216 | 717  | 26.53 | 239 |
| RcBBX4  | RC2G0139900 | Chr02:11653012..11655635 | 561  | 20.34 | 187 |
| RcBBX5  | RC2G0315700 | Chr02:33096974..33097822 | 639  | 22.80 | 213 |
| RcBBX6  | RC2G0491300 | Chr02:57402185..57405076 | 696  | 25.77 | 232 |
| RcBBX7  | RC2G0501900 | Chr02:58418265..58419568 | 792  | 28.46 | 264 |
| RcBBX8  | RC2G0550600 | Chr02:63202976..63205538 | 1350 | 49.28 | 450 |
| RcBBX9  | RC2G0550700 | Chr02:63205797..63207626 | 270  | 10.74 | 90  |
| RcBBX10 | RC2G0558900 | Chr02:64087302..64088912 | 765  | 28.49 | 255 |
| RcBBX11 | RC2G0585400 | Chr02:66344092..66346528 | 882  | 32.77 | 294 |
| RcBBX12 | RC4G0386100 | Chr04:49891627..49894003 | 1359 | 51.58 | 453 |
| RcBBX13 | RC4G0385900 | Chr04:49862326..49862904 | 576  | 20.01 | 192 |
| RcBBX14 | RC4G0386000 | Chr04:49863689..49867711 | 1041 | 38.42 | 347 |

|         |             |                          |      |       |     |
|---------|-------------|--------------------------|------|-------|-----|
| RcBBX15 | RC4G0394000 | Chr04:50602599..50604335 | 1338 | 49.92 | 446 |
| RcBBX16 | RC5G0261500 | Chr05:22136743..22140055 | 855  | 30.09 | 285 |
| RcBBX17 | RC5G0319200 | Chr05:29061736..29062603 | 723  | 26.01 | 241 |
| RcBBX18 | RC6G0195500 | Chr06:22416546..22417889 | 648  | 24.34 | 216 |
| RcBBX19 | RC6G0423000 | Chr06:53394265..53397720 | 1167 | 43.11 | 389 |
| RcBBX20 | RC6G0448100 | Chr06:55381121..55382633 | 1203 | 44.00 | 401 |
| RcBBX21 | RC6G0508800 | Chr06:60256429..60257878 | 891  | 32.19 | 297 |
| RcBBX22 | RC7G0081000 | Chr07:5581172..5583667   | 1539 | 57.77 | 513 |

*Prunus Avioum (Sweet Cherry)*

|         |                           |                                 |      |       |     |
|---------|---------------------------|---------------------------------|------|-------|-----|
| PaBBX1  | Pav_sc0004527.1_g080.1.mk | PAV_r1.0chr1:17737787..17743220 | 717  | 26.43 | 239 |
| PaBBX2  | Pav_sc0001051.1_g030.1.mk | PAV_r1.0chr1:24564167..24566102 | 999  | 35.19 | 333 |
| PaBBX3  | Pav_sc0001181.1_g240.1.mk | PAV_r1.0chr1:24997238..24998521 | 1950 | 71.18 | 650 |
| PaBBX4  | Pav_sc0000131.1_g850.1.mk | PAV_r1.0chr1:29989611..29991028 | 1350 | 49.26 | 450 |
| PaBBX5  | Pav_sc0002456.1_g010.1.mk | PAV_r1.0chr1:43036607..43051043 | 891  | 33.28 | 297 |
| PaBBX6  | Pav_sc0000293.1_g410.1.mk | PAV_r1.0chr3:661262..662056     | 1029 | 38.77 | 343 |
| PaBBX7  | Pav_sc0000592.1_g560.1.mk | PAV_r1.0chr3:11351478..11353057 | 1644 | 59.04 | 548 |
| PaBBX8  | Pav_sc0000488.1_g110.1.mk | PAV_r1.0chr3:14498374..14502886 | 792  | 28.08 | 264 |
| PaBBX9  | Pav_sc0000405.1_g160.1.mk | PAV_r1.0chr3:16146055..16148421 | 672  | 24.55 | 224 |
| PaBBX10 | Pav_sc0000405.1_g200.1.mk | PAV_r1.0chr3:16170043..16170396 | 1254 | 45.29 | 418 |
| PaBBX11 | Pav_sc0001859.1_g200.1.mk | PAV_r1.0chr3:16934620..16935833 | 1197 | 42.79 | 399 |
| PaBBX12 | Pav_sc0000051.1_g110.1.mk | PAV_r1.0chr3:18112949..18115389 | 351  | 13.82 | 117 |
| PaBBX13 | Pav_sc0000598.1_g150.1.mk | PAV_r1.0chr4:1931059..1932064   | 456  | 17.06 | 152 |
| PaBBX14 | Pav_sc0000352.1_g070.1.mk | PAV_r1.0chr4:11752866..11755126 | 972  | 35.87 | 324 |
| PaBBX15 | Pav_sc0000124.1_g140.1.mk | PAV_r1.0chr4:14560239..14561009 | 612  | 23.58 | 204 |
| PaBBX16 | Pav_sc0000383.1_g410.1.mk | PAV_r1.0chr5:15713586..15715861 | 900  | 31.31 | 300 |
| PaBBX17 | Pav_sc0000044.1_g810.1.mk | PAV_r1.0chr7:13871819..13874309 | 576  | 21.37 | 192 |
| PaBBX18 | Pav_sc0000175.1_g260.1.mk | PAV_r1.0chr8:8049172..8053512   | 1440 | 53.68 | 480 |
| PaBBX19 | Pav_sc0001518.1_g660.1.mk | PAV_r1.0chr8:8383526..8384850   | 687  | 25.08 | 229 |
| PaBBX20 | Pav_sc0000848.1_g470.1.mk | PAV_r1.0chr8:19897720..19900725 | 546  | 20.75 | 182 |
| PaBBX21 | Pav_sc0004527.1_g080.1.mk | PAV_r1.0chr1:17737787..17743220 | 624  | 23.66 | 208 |
| PaBBX22 | Pav_sc0001051.1_g030.1.mk | PAV_r1.0chr1:24564167..24566102 | 1173 | 43.97 | 391 |

*Rubus occidentalis (Black raspberry)*

|        |             |                              |      |       |     |
|--------|-------------|------------------------------|------|-------|-----|
| RoBBX1 | Bras_T01148 | chr1_v1.1:19757119..19760254 | 747  | 27.66 | 249 |
| RoBBX2 | Bras_T23037 | chr2_v1.1:5029153..5033176   | 624  | 23.86 | 208 |
| RoBBX3 | Bras_T14233 | chr2_v1.1:5300809..5302758   | 645  | 24.04 | 215 |
| RoBBX4 | Bras_T02515 | chr2_v1.1:9603227..9604828   | 1017 | 37.33 | 339 |
| RoBBX5 | Bras_T02294 | chr2_v1.1:10747166..10748922 | 900  | 32.76 | 300 |
| RoBBX6 | Bras_T07074 | chr2_v1.1:17881853..17884695 | 1185 | 43.45 | 395 |
| RoBBX7 | Bras_T18105 | chr3_v1.1:20008409..20009743 | 741  | 27.93 | 247 |
| RoBBX8 | Bras_T18591 | chr3_v1.1:23954027..23956321 | 846  | 30.88 | 282 |
| RoBBX9 | Bras_T05889 | chr3_v1.1:31762193..31767034 | 684  | 25.37 | 228 |

|                                    |                |                                 |      |       |     |
|------------------------------------|----------------|---------------------------------|------|-------|-----|
| RoBBX10                            | Bras_T02680    | chr4_v1.1:4650595..4652026      | 1302 | 48.18 | 434 |
| RoBBX11                            | Bras_T23114    | chr4_v1.1:7464873..7467556      | 1437 | 52.30 | 479 |
| RoBBX12                            | Bras_T25113    | chr4_v1.1:11937754..11939524    | 1095 | 40.34 | 365 |
| RoBBX13                            | Bras_T16297    | chr5_v1.1:3211002..3213352      | 1359 | 50.09 | 453 |
| RoBBX14                            | Bras_T03753    | chr6_v1.1:228708..229566        | 648  | 23.07 | 216 |
| RoBBX15                            | Bras_T04853    | chr6_v1.1:4550295..4552732      | 1188 | 43.48 | 396 |
| RoBBX16                            | Bras_T23364    | chr6_v1.1:5339364..5340269      | 795  | 28.96 | 265 |
| RoBBX17                            | Bras_T22204    | chr6_v1.1:5605179..5605529      | 348  | 13.29 | 116 |
| RoBBX18                            | Bras_T22203    | chr6_v1.1:5607139..5609397      | 1359 | 49.44 | 453 |
| RoBBX19                            | Bras_T26276    | chr6_v1.1:15029911..15032044    | 546  | 19.54 | 182 |
| RoBBX20                            | Bras_T24206    | chr6_v1.1:15618605..15619375    | 768  | 27.22 | 256 |
| <i>Prunus Persica (Peach)</i>      |                |                                 |      |       |     |
| PpBBX1                             | ppa007083m     | scaffold_1:6788512..6789796     | 1149 | 41.82 | 383 |
| PpBBX2                             | ppa010704m     | scaffold_1:17830935..17834763   | 717  | 26.54 | 239 |
| PpBBX3                             | ppa004756m     | scaffold_1:22447084..22450267   | 1479 | 53.48 | 493 |
| PpBBX4                             | ppa005713m     | scaffold_1:29244300..29245928   | 1341 | 49.78 | 447 |
| PpBBX5                             | ppa022195m     | scaffold_1:29624131..29626487   | 1380 | 51.78 | 460 |
| PpBBX6                             | ppa011525m     | scaffold_1:32859280..32860179   | 621  | 22.30 | 207 |
| PpBBX7                             | ppa008143m     | scaffold_1:34301935..34303374   | 1029 | 38.51 | 343 |
| PpBBX8                             | ppa026514m     | scaffold_3:611907..612413       | 507  | 17.98 | 169 |
| PpBBX9                             | ppa010493m     | scaffold_3:12066729..12068386   | 741  | 27.48 | 247 |
| PpBBX10                            | ppa006303m     | scaffold_3:15262568..15266469   | 1254 | 45.27 | 418 |
| PpBBX11                            | ppa025622m     | scaffold_3:16815877..16818464   | 1353 | 49.75 | 451 |
| PpBBX12                            | ppa022228m     | scaffold_3:16836056..16836409   | 351  | 13.94 | 117 |
| PpBBX13                            | ppa009942m     | scaffold_3:17290319..17291325   | 813  | 29.29 | 271 |
| PpBBX14                            | ppa007007m     | scaffold_3:18343501..18345686   | 1158 | 42.31 | 386 |
| PpBBX15                            | ppa010671m     | scaffold_4:11588344..11589492   | 720  | 26.90 | 240 |
| PpBBX16                            | ppa017267m     | scaffold_5:17214327..17217139   | 1320 | 49.99 | 440 |
| PpBBX17                            | ppa012724m     | scaffold_7:17379028..17381072   | 471  | 17.07 | 157 |
| PpBBX18                            | ppa011488m     | scaffold_8:11063691..11065316   | 624  | 22.95 | 208 |
| PpBBX19                            | ppa026391m     | scaffold_8:11362565..11363292   | 624  | 23.75 | 208 |
| PpBBX20                            | ppa006893m     | scaffold_8:20983651..20985809   | 1173 | 43.28 | 391 |
| <i>Fragaria vesca (Strawberry)</i> |                |                                 |      |       |     |
| FvBBX1                             | FvH4_1g12110.1 | Fvb1_v4.0.a1:6615402..6618534   | 558  | 20.20 | 186 |
| FvBBX2                             | FvH4_2g10070.1 | Fvb2_v4.0.a1:8897464..8898927   | 636  | 23.62 | 212 |
| FvBBX3                             | FvH4_2g24910.1 | Fvb2_v4.0.a1:20252285..20254597 | 1221 | 45.37 | 407 |
| FvBBX4                             | FvH4_2g38990.1 | Fvb2_v4.0.a1:28109209..28111377 | 939  | 34.57 | 313 |
| FvBBX5                             | FvH4_2g41420.1 | Fvb2_v4.0.a1:29305066..29306602 | 936  | 34.73 | 312 |
| FvBBX6                             | FvH4_3g03640.1 | Fvb3_v4.0.a1:2045334..2045885   | 549  | 20.61 | 183 |
| FvBBX7                             | FvH4_3g17750.1 | Fvb3_v4.0.a1:11299511..11301015 | 861  | 30.6  | 287 |
| FvBBX8                             | FvH4_3g21230.1 | Fvb3_v4.0.a1:14224437..14225826 | 741  | 27.5  | 247 |

|         |                |                                 |      |        |      |
|---------|----------------|---------------------------------|------|--------|------|
| FvBBX9  | FvH4_4g08980.1 | Fvb4_v4.0.a1:10078078..10079648 | 1068 | 38.97  | 356  |
| FvBBX10 | FvH4_4g10930.1 | Fvb4_v4.0.a1:14597113..14598985 | 714  | 26.62  | 238  |
| FvBBX11 | FvH4_4g23090.1 | Fvb4_v4.0.a1:25667550..25687393 | 3483 | 126.05 | 1161 |
| FvBBX12 | FvH4_4g26540.1 | Fvb4_v4.0.a1:27897258..27898373 | 489  | 17.56  | 163  |
| FvBBX13 | FvH4_4g26550.1 | Fvb4_v4.0.a1:27899035..27902637 | 1413 | 52.81  | 471  |
| FvBBX14 | FvH4_4g27390.1 | Fvb4_v4.0.a1:28409275..28411534 | 1350 | 50.90  | 450  |
| FvBBX15 | FvH4_5g12150.1 | Fvb5_v4.0.a1:6852197..6854626   | 1371 | 51.43  | 457  |
| FvBBX16 | FvH4_6g37140.1 | Fvb6_v4.0.a1:29197326..29198120 | 792  | 28.63  | 264  |
| FvBBX17 | FvH4_6g37790.1 | Fvb6_v4.0.a1:29751710..29755900 | 210  | 7.93   | 70   |
| FvBBX18 | FvH4_6g40380.1 | Fvb6_v4.0.a1:31931440..31935769 | 1251 | 45.46  | 417  |
| FvBBX19 | FvH4_6g43570.1 | Fvb6_v4.0.a1:33682892..33686067 | 1332 | 48.65  | 444  |
| FvBBX20 | FvH4_6g43580.1 | Fvb6_v4.0.a1:33686668..33687006 | 336  | 12.81  | 112  |
| FvBBX21 | FvH4_6g44270.1 | Fvb6_v4.0.a1:34125442..34128499 | 756  | 27.25  | 252  |

**Table S2:** The detail information about physiochemical characteristics of BBX Gene family in seven *Rosacea* species.

| Name    | Isoelectric Point | Instability Index | GRAVY  | Major Amino Acid <sup>a</sup> | Aliphatic Index | Strand |
|---------|-------------------|-------------------|--------|-------------------------------|-----------------|--------|
| MdBBX1  | 5.74              | 48.93             | -0.571 | A(10.6%)、S(10%)、V(7.4%)       | 65.18           | +      |
| MdBBX2  | 8.11              | 47.83             | -0.295 | S(10.8%)、A(10.6%)、P(7.9%)     | 71.47           | -      |
| MdBBX3  | 5.35              | 45.68             | -0.372 | L(10.7%)、G(9.4%)、A(8.1%)      | 74.63           | -      |
| MdBBX4  | 6.55              | 40.02             | -0.128 | L(10.5%)、G(8.9%)、R(8.1%)      | 76.21           | +      |
| MdBBX5  | 6.75              | 51.71             | 0.62   | L(9.3%)、V(8.9%)、P(8.5%)       | 95.56           | -      |
| MdBBX6  | 9.53              | 49.57             | -0.203 | V(9.0%)、L(8.6%)、P(8.2%)       | 84.64           | +      |
| MdBBX7  | 4.58              | 69.35             | -0.791 | S(13.2%)、D(9.7%)、E(9.7%)      | 56.11           | +      |
| MdBBX8  | 4.58              | 69.35             | -0.791 | S(13.2%)、D(9.7%)、E(9.7%)      | 56.11           | +      |
| MdBBX9  | 4.58              | 69.35             | -0.791 | S(13.2%)、D(9.7%)、E(9.7%)      | 56.11           | +      |
| MdBBX10 | 7.50              | 27.50             | 0.187  | A(12.9%)、C(12.9%)、L/K(10%)    | 94.86           | +      |
| MdBBX11 | 6.13              | 41.54             | -0.173 | L(8.9%)、G(8.3%)、S(7.7%)       | 82.49           | -      |
| MdBBX12 | 8.41              | 60.04             | -0.618 | A(9.4%)、R(8.3%)、P(7.7%)       | 66.85           | +      |
| MdBBX13 | 4.55              | 49.07             | -0.864 | E(12.9%)、D(9.7%)、S(9.7%)      | 52.96           | +      |
| MdBBX14 | 5.21              | 54.60             | -0.574 | A/E(9.8%)、G/L(7.8%)           | 71.79           | -      |
| MdBBX15 | 7.14              | 44.83             | -0.449 | A(9.7%)、G(8.5%)、L(8.2%)       | 65.67           | -      |
| MdBBX16 | 8.88              | 57.75             | -0.342 | A(12%)、S(11%)、P/T(8.5%)       | 60.94           | +      |
| MdBBX17 | 6.54              | 48.50             | -0.215 | S(10.7%)、A(9.8%)、L(8.5%)      | 75.21           | +      |
| MdBBX18 | 8.44              | 47.81             | -0.219 | S(10.6%)、A(10.4%)、L(8.8%)     | 78.31           | +      |
| MdBBX19 | 6.28              | 49.36             | -0.381 | L(9.0%)、S(8.8%)、A(7.9%)       | 71.44           | -      |
| MdBBX20 | 5.76              | 40.53             | -0.602 | A(9.7%)、S(8.4%)、E(7.1%)       | 62.02           | -      |
| MdBBX21 | 4.37              | 60.15             | -0.906 | D(14.8%)、S(12.6%)、A(8.3%)     | 50.13           | -      |
| MdBBX22 | 4.11              | 53.65             | -0.837 | D(15.7%)、S(11.9%)、G(7.0%)     | 50.65           | +      |
| MdBBX23 | 5.70              | 46.68             | -0.494 | S(12.5%)、G(7.5%)、L(7.5%)      | 61.43           | -      |
| MdBBX24 | 5.90              | 54.05             | -0.651 | S(13.2%)、A(9.1%)、G(7.0%)      | 54.89           | +      |

|         |      |       |         |                              |       |   |
|---------|------|-------|---------|------------------------------|-------|---|
| MdBBX25 | 6.68 | 63.24 | -0.044  | A(12.9%)、C(12.9%)、S(9.7%)    | 75.65 | - |
| MdBBX26 | 5.28 | 45.97 | -0.221  | S(10.6%)、G(9.4%)、A(7.9%)     | 68.18 | + |
| MdBBX27 | 6.44 | 61.80 | -0.503  | S(16.8%)、L(8.7%)、E/ K(6.7%)  | 64.76 | + |
| MdBBX28 | 5.59 | 42.24 | -0.460  | A(9.2%)、S(9.2%)、D(8.1%)      | 73.87 | - |
| MdBBX29 | 7.52 | 48.65 | -0.617  | S(9.4%)、G(8.5%)、E(7.6%)      | 56.89 | - |
| MdBBX30 | 6.59 | 50.47 | -0.485  | S(11.9%)、A(7.6%)、P(7.3%)     | 59.14 | - |
| MdBBX31 | 6.48 | 60.25 | -0.652  | T(11.1%)、L(9.5%)、A(9.5%)     | 71.27 | + |
| MdBBX32 | 5.22 | 49.84 | -0.816  | D(10.6%)、A(9.3%)、S(8.6%)     | 56.59 | - |
| MdBBX33 | 5.22 | 49.81 | -0.816  | D(10.6%)、A(9.3%)、S(8.6%)     | 56.59 | + |
| MdBBX34 | 9.77 | 52.59 | -0.457  | A(16.7%)、K(11.9%)、S(10.3%)   | 75.26 | - |
| MdBBX35 | 8.92 | 57.56 | -0.638  | L(11.4%)、S(9.7%)、G(9.2%)     | 70.16 | - |
| MdBBX36 | 5.71 | 52.51 | -0.230  | S(11.6%)、A(8.0%)、G(7.3%)     | 67.08 | + |
| MdBBX37 | 5.94 | 41.22 | -0.440  | L(10.8%)、S(9.9%)、G(8.8%)     | 80.34 | + |
| MdBBX38 | 5.58 | 44.52 | -0.402  | L(11.2%)、G(9.6%)、S(9.3%)     | 76.19 | + |
| MdBBX39 | 5.56 | 46.47 | -0.544  | G(8.3%)、V(8.3%)、A(7.1%)      | 71.90 | + |
| MdBBX40 | 8.72 | 55.70 | -0.280  | S(14.0%)、R(9.2%)、A(8.9%)     | 65.87 | + |
| MdBBX41 | 4.77 | 57.32 | -0.612  | E(10.3%)、L(7.8%)、D(7.2%)     | 69.23 | - |
| MdBBX42 | 5.65 | 57.84 | -0.383  | L(10.4%)、S(9.6%)、E/A(6.9%)   | 82.03 | - |
| MdBBX43 | 6.03 | 43.45 | -0.738  | S(8.7%)、G(8.6%)、D(8.6%)      | 59.91 | - |
| MdBBX44 | 5.33 | 44.40 | -0.808  | D(10.6%)、S(9.1%)、G(8.2%)     | 58.59 | + |
| MdBBX45 | 6.07 | 47.10 | -0.268  | S(10.9%)、A(10.1%)、P(7.7%)    | 72.53 | + |
| MdBBX46 | 5.40 | 36.26 | -0.611` | A(10.4%)、S(8.1%)、E(6.9%)     | 61.88 | - |
| MdBBX47 | 5.40 | 36.26 | -0.611` | A(10.4%)、S(8.1%)、E(6.9%)     | 61.88 | - |
| MdBBX48 | 6.50 | 26.90 | -0.760  | S(8.0%)、A(8.0%)、Q(7.6%)      | 57.45 | - |
| MdBBX49 | 4.90 | 64.29 | -0.901  | S(13.4%)、D(11.5%)、R(9.6%)    | 55.03 | - |
| MdBBX50 | 4.53 | 73.41 | -0.997  | S(13.6%)、D(13.2%)、R(9.5%)    | 49.63 | - |
| MdBBX51 | 6.15 | 56.20 | -0.625  | S(14.4%)、A(9.0%)、G(6.8%)     | 56.36 | - |
| MdBBX52 | 8.80 | 52.51 | -0.297  | S(13.3%)、A(10.4%)、R(9.3%)    | 66.89 | - |
| MdBBX53 | 4.58 | 37.86 | -0.320  | S(11.5%)、A(8.5%)、L(8.5%)     | 73.70 | - |
| MdBBX54 | 5.88 | 52.74 | -0.352  | L(10.9%)、R(7.9%)、D(7.4%)     | 89.31 | - |
| MdBBX55 | 4.95 | 40.12 | -0.328  | S(10.3%)、A(9.5%)、L(8.6%)     | 76.34 | + |
| MdBBX56 | 4.79 | 46.27 | -0.150  | S(12.8%)、L(10.2%)、A(8.6%)    | 84.55 | + |
| MdBBX57 | 3.33 | 58.69 | -0.276  | L(12.5%)、S(11.4%)、P(8.3%)    | 83.49 | + |
| MdBBX58 | 9.91 | 37.04 | -0.133  | A(10.5%)、L(8.8%)、S(7.9%)     | 85.47 | - |
| MdBBX59 | 5.00 | 44.38 | -0.307  | S(10.7%)、L(10.0%)、A(9.0%)    | 81.30 | + |
| MdBBX60 | 7.16 | 54.70 | -0.710  | S(11.1%)、L(7.5%)、R(6.9%)     | 62.88 | - |
| MdBBX61 | 4.58 | 69.35 | -0.791  | S(13.2%)、D(9.7%)、E(9.7%)     | 56.11 | + |
| MdBBX62 | 5.59 | 42.24 | -0.460  | A(9.2%)、S(9.2%)、V(9.2%)      | 73.87 | + |
| MdBBX63 | 5.59 | 42.24 | -0.460  | A(9.2%)、S(9.2%)、V(9.2%)      | 73.87 | + |
| MdBBX64 | 6.45 | 48.28 | -0.209  | S(10.8%)、A(9.9%)、L(8.6%)     | 76.18 | + |
| MdBBX65 | 6.68 | 63.56 | -0.015  | A(14.5%)、C(12.9%)、S(9.7%)    | 77.26 | - |
| MdBBX66 | 5.91 | 40.69 | 0.168   | A(14.5%)、C(12.8%)、L(12.8%)   | 95.26 | - |
| MdBBX67 | 4.61 | 40.93 | -0.465  | G(18.2%)、E(13.2%)、V(10.7%)   | 61.98 | + |
| PcBBX1  | 5.23 | 47.38 | -0.782  | D (10.4), A (7.7), G (8.2)   | 60.88 | + |
| PcBBX2  | 5.42 | 58.32 | -0.44   | S (13.5), L (9.3), D (6.9)   | 70.99 | - |
| PcBBX3  | 5.96 | 46.7  | -0.538  | A (10.9), S (10.0), D (7.6)  | 67.18 | + |
| PcBBX4  | 4.7  | 72.38 | -0.785  | S (13.5), E (9.9), D (8.5)   | 57.3  | - |
| PcBBX5  | 8.85 | 51.52 | -0.327  | A (10.4), S (13.0), R (10.0) | 66.52 | + |

|         |      |       |        |                              |       |   |
|---------|------|-------|--------|------------------------------|-------|---|
| PcBBX6  | 6.85 | 50.96 | -0.465 | S (11.6), A (8.9), P (7.0)   | 59.5  | - |
| PcBBX7  | 4.33 | 55.09 | -0.931 | E(14.3), S (11.3), D (10.7)  | 49.88 | - |
| PcBBX8  | 5.93 | 53.77 | -0.64  | G (9.3), S (9.8), E (7.8)    | 54.7  | + |
| PcBBX9  | 5.42 | 36.04 | -0.305 | L (12.6), N (8.1), S (9.3)   | 88.74 | - |
| PcBBX10 | 5.83 | 40.32 | -0.619 | A (9.3), E (7.0), V (6.5)    | 62.54 | - |
| PcBBX11 | 4.81 | 33.55 | -0.106 | G (13.7), A (9.9), S (9.2)   | 68.47 | + |
| PcBBX12 | 5.28 | 55.89 | -0.31  | S(12.1), A (7.9), V (6.6)    | 64.59 | - |
| PcBBX13 | 6.04 | 44.86 | -0.517 | L (9.0), D (8.0), N (7.5)    | 80    | - |
| PcBBX14 | 6.41 | 55.99 | -0.707 | S (11.7), L (7.8), E (7.0)   | 64.66 | - |
| PcBBX15 | 4.58 | 74.24 | -0.931 | D (13.3), R (9.3), A (7.7)   | 50.77 | + |
| PcBBX16 | 6.08 | 52.45 | -0.608 | S(14.2), A (8.7), L (7.0)    | 59.52 | - |
| PcBBX17 | 5.82 | 42.58 | -0.573 | A (10.6), S (9.2), E (6.7)   | 63.3  | + |
| PcBBX18 | 5.70 | 44.91 | -0.518 | G (7.4), S (12.0), L (7.4)   | 59.43 | - |
| PcBBX19 | 4.08 | 83.51 | -1.19  | E(12.9), S (13.6), D (12.9)  | 42.99 | - |
| PcBBX20 | 5.93 | 55.99 | -0.408 | S (10.6), A (9.6), L (7.0)   | 63.62 | + |
| PcBBX21 | 6.66 | 51.01 | -0.377 | A (9.9), R (7.7), L (7.7)    | 77.79 | - |
| PcBBX22 | 5.25 | 46.84 | -0.074 | S 99.6), A (8.5), V (8.1)    | 76.88 | + |
| PcBBX23 | 5.91 | 59.53 | -0.617 | S (13.7), A (8.2), G (7.0)   | 53.88 | + |
| PcBBX24 | 4.94 | 45.74 | -0.242 | L (11.1), A (9.1), S (9.4)   | 85.79 | - |
| PcBBX25 | 5.61 | 48.54 | -0.518 | S (10.3), G (9.8), L (8.5)   | 67.39 | - |
| PcBBX26 | 9.14 | 57.46 | -0.314 | S (13.3), R (9.6), A (9.2)   | 66.61 | - |
| PcBBX27 | 4.55 | 67.97 | -0.933 | D (13.4), S (13.0), G (7.7)  | 49.63 | + |
| PcBBX28 | 4.36 | 67.71 | -0.112 | E(16.5), S 911.2), D (11.2)  | 48.24 | - |
| PcBBX29 | 6.51 | 50.96 | -0.367 | S (11.5), A (10.0), P (8.0)  | 69.54 | + |
| PcBBX30 | 6.1  | 43.22 | 0.006  | S (11.2), A (7.5), L (9.6)   | 85.29 | - |
| PcBBX31 | 5.95 | 43.84 | -0.451 | S (10.6), A (10.6), R (7.1)  | 72.29 | - |
| PcBBX32 | 5.19 | 42.18 | -0.338 | A (10.2), E (8.8), L (7.8)   | 72.88 | - |
| PcBBX33 | 5.21 | 45.91 | -0.686 | E (9.0), A (8.1), D (8.1)    | 68.84 | + |
| PcBBX34 | 5.2  | 42.96 | -0.123 | S (11.0), A (10.4), L (8.9)  | 80.18 | + |
| PcBBX35 | 5.32 | 56.21 | -0.596 | A (9.1), E (9.3), G (7.9)    | 70.16 | + |
| PcBBX36 | 5.97 | 29.57 | -0.352 | A (8.0), S (8.4), L (7.7)    | 72.58 | - |
| PcBBX37 | 5.5  | 46.64 | -0.797 | D (10.4), A (8.8), G (7.5)   | 57.2  | + |
| PcBBX38 | 6.06 | 46.05 | -0.36  | V (10.1), L (8.5), N (8.0)   | 86.63 | + |
| PcBBX39 | 5.09 | 44.18 | -0.383 | S (11.6), A (9.5), L (7.9)   | 71.82 | - |
| PcBBX40 | 4.87 | 48.94 | -0.352 | S (11.4), N (9.4), G (8.5)   | 67.33 | + |
| RcBBX1  | 5.17 | 54.22 | -0.471 | A (10.1), S (13.9), G (7.2)  | 60.91 | + |
| RcBBX2  | 6.24 | 45.62 | -0.302 | S (11.5), A (10.3), V (7.3)  | 72.79 | + |
| RcBBX3  | 4.79 | 43.02 | -0.29  | S (10.9), A (9.6), D (7.9)   | 79.25 | - |
| RcBBX4  | 6.87 | 51.57 | -0.584 | A(10.2), R (8.0), D (8.0)    | 68.41 | + |
| RcBBX5  | 4.85 | 47.63 | 0.125  | G (11.7), S (10.3), A (8.0)  | 80.09 | + |
| RcBBX6  | 6.64 | 41.04 | -0.237 | S (11.6), L (8.6), A (6.5)   | 79.01 | + |
| RcBBX7  | 9.57 | 56.47 | -0.02  | S (14.8), R (9.1), G (8.7)   | 76.06 | + |
| RcBBX8  | 5.51 | 57.79 | -0.562 | S (13.1), L (7.6), G (6.7)   | 61.13 | + |
| RcBBX9  | 8.70 | 32.57 | 0.038  | L (12.2), C (11.2), R (9.2)  | 92.45 | - |
| RcBBX10 | 4.83 | 60.87 | -0.924 | D (13.7), S (10.2), R (11.0) | 58.98 | + |
| RcBBX11 | 8.59 | 36.62 | -0.459 | A (10.5), S (9.2), R (7.8)   | 63.78 | + |
| RcBBX12 | 5.52 | 61.53 | -0.674 | S (13.0), D (9.1), L (7.1)   | 59.62 | - |
| RcBBX13 | 6.36 | 35.32 | 0.222  | S (11.5), L (11.5), H (7.3)  | 100.0 | - |
| RcBBX14 | 7.01 | 53.61 | -0.481 | S (13.3), L (8.1), A (6.6)   | 75.88 | - |
| RcBBX15 | 5.78 | 54.12 | -0.767 | S (11.4), E (8.3), A (8.1)   | 58    | - |
| RcBBX16 | 4.91 | 61.87 | -0.313 | S (11.6), A (9.1), G (8.8)   | 60.95 | + |
| RcBBX17 | 4.31 | 57.12 | -0.815 | E (14.1), S (10.8), D (9.5)  | 58.22 | - |
| RcBBX18 | 5.98 | 50.53 | -0.47  | S (13.0), D (8.3), C (7.4)   | 65.93 | + |
| RcBBX19 | 5.79 | 62.41 | -0.671 | S (11.3), E (8.0), L (7.7)   | 58.43 | - |



|         |      |       |        |                               |       |   |
|---------|------|-------|--------|-------------------------------|-------|---|
| RcBBX20 | 6.09 | 44.85 | -0.628 | S (10.5), A (9.0), R (7.7)    | 67.41 | + |
| RcBBX21 | 6.11 | 55.25 | -0.523 | S (14.1), A (6.7), N (6.7)    | 62.76 | + |
| RcBBX22 | 5.74 | 48.36 | -0.686 | E (8.8), G (7.8), L (7.6)     | 66.71 | + |
| PaBBX1  | 4.77 | 40.44 | -0.315 | A (10.9), E (8.4), L (7.9)    | 74.81 | + |
| PaBBX2  | 4.95 | 51.92 | -0.046 | S (13.2) A (10.8), D (7.5)    | 82.97 | + |
| PaBBX3  | 6.80 | 43.03 | -0.458 | L (10.5) G (9.5), D (7.2)     | 74.68 | - |
| PaBBX4  | 5.15 | 55.27 | -0.79  | A (8.7), E (8.4), D (8.7)     | 56.84 | + |
| PaBBX5  | 6.88 | 52.15 | -0.818 | S (10.8), L (8.8), Q (7.7)    | 59.43 | + |
| PaBBX6  | 5.47 | 46.48 | -0.539 | S (10.7), A (9.3) V (9.3)     | 65.95 | + |
| PaBBX7  | 5.29 | 48.01 | -0.758 | G (9.9), S (9.1), R (7.8)     | 62.06 | - |
| PaBBX8  | 9.32 | 53.95 | -0.246 | S (13.6) A (11.4), G (8.3)    | 72.16 | + |
| PaBBX9  | 5.13 | 41.15 | -0.426 | A (8.9), L (9.8), S (9.8)     | 72.37 | + |
| PaBBX10 | 5.52 | 56.34 | -0.508 | S (13.2), A (8.9), L (6.9)    | 60.02 | - |
| PaBBX11 | 5.07 | 57.97 | -0.485 | S (13.8), G (8.5), N (7.5)    | 63.13 | - |
| PaBBX12 | 9.13 | 59.62 | -0.161 | C (10.3), L (11.1), R (11.1)  | 77.44 | - |
| PaBBX13 | 9.09 | 88.73 | -0.849 | R (12.5), S (13.2), A (9.2)   | 60.46 | + |
| PaBBX14 | 5.78 | 43.12 | -0.482 | A (11.4), S (9.3), E (7.1)    | 67.25 | - |
| PaBBX15 | 4.51 | 60.61 | -1.254 | D ( 12.3), S (12.3), E (10.3) | 38.58 | + |
| PaBBX16 | 5.53 | 63.35 | -0.327 | S (12.7), G (10.7), A (8.3)   | 63.03 | + |
| PaBBX17 | 4.78 | 58.79 | -0.698 | D (10.9), R (8.9), E (9.9)    | 73.7  | + |
| PaBBX18 | 5.12 | 48.46 | -0.77  | D (8.5), E (8.5), A (8.1)     | 62.23 | - |
| PaBBX19 | 8.51 | 48.36 | -0.387 | A (9.2), R (8.3), S (7.0)     | 74.1  | + |
| PaBBX20 | 8.71 | 56.35 | -0.329 | L (9.3), R (7.7), S (7.7)     | 83.41 | + |
| PaBBX21 | 5.97 | 58.23 | -0.462 | S (13.9), A (7.2), C (6.7)    | 58.17 | + |
| PaBBX22 | 6.91 | 51.57 | -0.661 | S (11.8), A (7.2), G (7.4)    | 58.9  | - |
| RoBBX1  | 6.59 | 51.14 | -0.404 | (L)8.4, (R)7.6, (A)7.2        | 75.58 | - |
| RoBBX2  | 6.14 | 46.38 | -0.502 | (N)8.7, (V)8.2, (L)7.2        | 73.99 | - |
| RoBBX3  | 5.69 | 44.14 | -0.461 | (S)11.6, (D)8.8, (L)7.4       | 68.47 | + |
| RoBBX4  | 5.69 | 42.44 | -0.448 | (S)10.6, (A)8.6, (D)8.0       | 71.33 | - |
| RoBBX5  | 5.97 | 53.09 | -0.331 | (S)13.6, (A)7.3, (D)7.0       | 69.37 | - |
| RoBBX6  | 5.33 | 56.75 | -0.76  | (S)11.6, (L)8.1, (G)7.3       | 54.63 | + |
| RoBBX7  | 4.39 | 58.98 | -0.936 | (E)13.0, (S)10.5, (D)10.1     | 58.79 | + |
| RoBBX8  | 5.17 | 59.8  | -0.311 | (S)12.8, (A)9.2, (G)7.8       | 59.86 | - |
| RoBBX9  | 4.46 | 75.87 | -1.046 | (S)12.3, (E)11.8, (D)8.8      | 44.87 | + |
| RoBBX10 | 5.46 | 54.7  | -0.724 | (S)10.6, (D)9.2, (A)9.0       | 59.84 | + |
| RoBBX11 | 6.17 | 39.79 | -0.663 | (G)9.0, (L)7.9, (N)7.3        | 64.55 | + |
| RoBBX12 | 6.50 | 47.22 | -0.308 | (S)11.0, (A)8.8, (P)8.2       | 71.34 | - |
| RoBBX13 | 5.11 | 49.66 | -0.746 | (E)10.8, (G)8.4, (L)8.2       | 63.11 | + |
| RoBBX14 | 8.43 | 53.94 | -0.377 | (S)12.5, (A)8.8, (R)8.3       | 77.22 | + |
| RoBBX15 | 5.39 | 35.9  | -0.588 | (A)9.8, (S)8.8, (D)7.3        | 60.91 | + |
| RoBBX16 | 4.58 | 58.52 | -0.927 | (D)14.0, (S)11.7, (R)9.4      | 56.04 | - |
| RoBBX17 | 6.69 | 49.97 | -0.093 | (L)12.9, (C)9.5, (E)7.8       | 86.55 | - |
| RoBBX18 | 5.26 | 55.72 | -0.484 | (S)12.6, (L)8.2, (G)7.1       | 67.17 | + |
| RoBBX19 | 7.95 | 40.25 | -0.086 | (S)11.0, (L)8.2, (A)7.7       | 78.24 | - |
| RoBBX20 | 9.17 | 58.61 | -0.155 | (S)12.9, (A)10.5, (R)9.4      | 72.07 | + |
| PpBBX1  | 5.94 | 47.97 | -0.304 | (S)11.7, (A)10.7, (D)6.5      | 73.92 | + |
| PpBBX2  | 4.70 | 43.55 | -0.279 | (A)11.3, (S)9.6, L (8.8)      | 78.49 | + |
| PpBBX3  | 5.53 | 48.83 | -0.651 | (G)11.2, (L)8.9, (D)7.7       | 63.67 | - |
| PpBBX4  | 5.07 | 55.85 | -0.801 | (E)9.2, (S)8.5, (G)8.3        | 53.27 | + |
| PpBBX5  | 5.78 | 64.19 | -0.468 | (S)13.5, (L)9.8 (D) 7.6       | 68.48 | + |
| PpBBX6  | 7.56 | 45.64 | -0.287 | (S)12.1, (T)8.7, (A) 8.2      | 72.61 | + |
| PpBBX7  | 5.56 | 43.24 | -0.497 | (A)10.8, (S)10.5, (V)9.0      | 66.56 | - |
| PpBBX8  | 8.94 | 46.95 | -0.374 | (S)16.6, (A)10.7, (C)7.7      | 54.97 | - |
| PpBBX9  | 5.06 | 39.46 | -0.38  | (S)10.1, (A)8.9, (D)7.7       | 71.54 | + |

|         |      |       |        |                           |       |   |
|---------|------|-------|--------|---------------------------|-------|---|
| PpBBX10 | 5.63 | 55.89 | -0.485 | (S)12.9, (A)9.6, (G)7.4   | 60.74 | + |
| PpBBX11 | 5.74 | 53.96 | -0.556 | (S)12.2, (G)8.4, (N)7.3   | 58.4  | + |
| PpBBX12 | 9.32 | 59.93 | -0.247 | (R)12.0, (L)11.1, (C)9.4  | 77.44 | + |
| PpBBX13 | 4.73 | 74.93 | -1.067 | (S)14.4,(D)11.1, (R)8.5   | 49.37 | - |
| PpBBX14 | 5.22 | 46.66 | -0.588 | (A)9.8, (S)8.8, (E)7.3    | 63.99 | + |
| PpBBX15 | 4.38 | 63.21 | -0.765 | (E)13.3, (S)10.8 (D) 10.0 | 68.29 | + |
| PpBBX16 | 4.94 | 47.44 | -0.774 | (E)9.3, (D)8.9, (L)8.0    | 64.77 | - |
| PpBBX17 | 7.11 | 49.07 | -0.704 | (R)8.3, (D)7.6, (G)7.0    | 67.64 |   |
| PpBBX18 | 5.75 | 59.38 | -0.377 | (V)9.1, (L)7.7, (A)7.2    | 78.7  | - |
| PpBBX19 | 6.64 | 56.08 | -0.471 | (S)13.9, (A)7.2, (L)6.7   | 56.78 | + |
| PpBBX20 | 6.03 | 50.38 | -0.654 | (S)11.3, (L)8.2, (E)7.7   | 67.64 | - |
| FvBBX1  | 6.74 | 51.56 | -0.570 | (A)10.2, (D)8.6, (R) 8.1  | 68.23 | + |
| FvBBX2  | 6.17 | 47.96 | -0.622 | (S)13.7, (D)7.5, (A)6.6   | 58.44 | + |
| FvBBX3  | 5.34 | 56.44 | -0.506 | (S)10.3, (G)8.8, (A)6.1   | 60.39 | - |
| FvBBX4  | 6.62 | 49.21 | -0.461 | (S)14.1, (T)7.3, (N)6.1   | 66.36 | + |
| FvBBX5  | 6.33 | 48.1  | -0.512 | (S)11.9, (A)10.9, (D)7.4  | 69.49 | - |
| FvBBX6  | 4.37 | 65.89 | -1.086 | (S)12.6, (D)12.0,(E)10.9  | 44.75 | + |
| FvBBX7  | 5.12 | 56.32 | -0.313 | (S)10.8, (G)9.1, (A) 8.7  | 67.28 | + |
| FvBBX8  | 4.30 | 54.21 | -0.756 | (E)14.6, (D)10.1, (S)8.9  | 63.52 | - |
| FvBBX9  | 5.63 | 55.03 | -0.304 | (S)12.4, (A)10.4, (P)7.9  | 68.29 | + |
| FvBBX10 | 4.71 | 39.45 | -0.318 | (S)9.7, (D)8.4, (E)6.7    | 76.72 | - |
| FvBBX11 | 6.51 | 30.39 | -0.186 | (L)13.4, (S)9.0, (N)8.0   | 91.95 | + |
| FvBBX12 | 5.87 | 56.74 | -0.006 | (S)13.5, (L)12.3, (A)8.0  | 88.59 | - |
| FvBBX13 | 5.62 | 56.7  | -0.654 | (S)12.3, (D)8.5, (L)6.8   | 61.87 | - |
| FvBBX14 | 5.56 | 58.44 | -0.799 | (E)9.1, (A)8.4, (R)8.0    | 55.56 | - |
| FvBBX15 | 5.56 | 48.82 | -0.781 | (E)9.4, (G)7.9, (D)7.7    | 62.36 | - |
| FvBBX16 | 8.99 | 54.72 | -0.161 | (S)13.6,(R)10.6, (A)9.8   | 73.9  | - |
| FvBBX17 | 5.51 | 53.63 | 0.019  | (C)12.9,(A)11.4, (L)8.6   | 79.57 | - |
| FvBBX18 | 5.45 | 54.48 | -0.502 | (S)12.9, (A)9.1, (L)7.4   | 60.19 | + |
| FvBBX19 | 5.43 | 57.31 | -0.524 | (S)12.2,(L)8.1, (G)7.0    | 63.04 | + |
| FvBBX20 | 8.75 | 54.05 | 0.008  | (L)10.7, (R)9.8, (C)8.9   | 95.8  | - |
| FvBBX21 | 4.71 | 51.57 | -0.902 | (D)13.9, (S)11.1,(R)9.5   | 60.08 | + |

**Table S2. Abbreviations:** Pl, protein length; pIs, isoelectric point; Ii, index instability; Ai, aliphatic index; GRAVY, grand average of hydropathicity; (A, Ala; P, Pro; S, Ser; G, Gly; L, Leu; N, ASN; T, Thr). The information about protein was taken from ExPASy (<http://web.expasy.org/protparam/>)

Figure S1a: Detail alignment sequences of B-BOX1 domain of BBX gene family of seven *Rosacea* species.

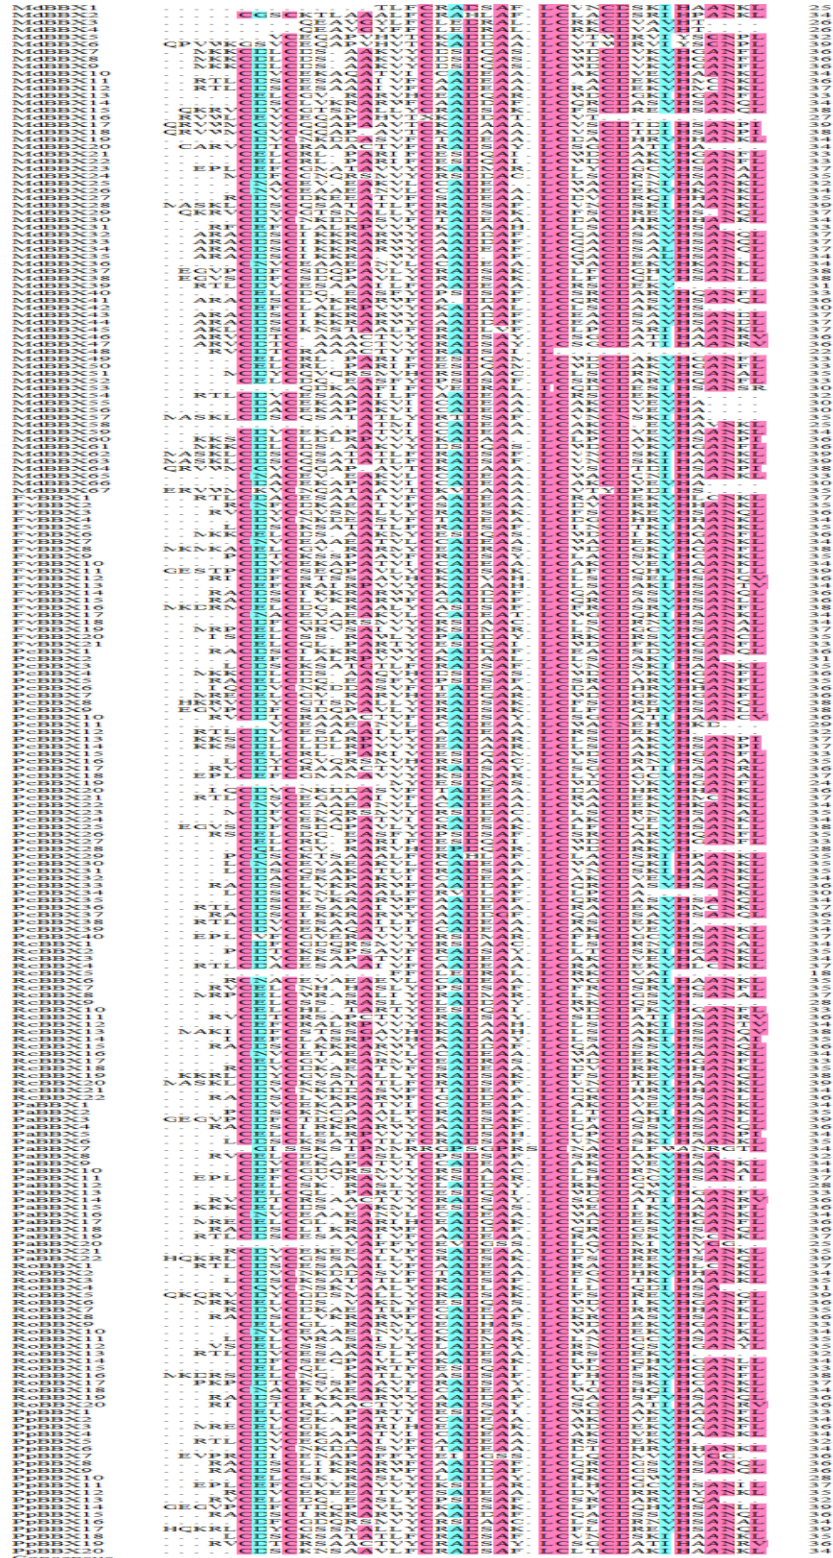



Figure S1c: Detail alignment sequences of CCT domain of BBX gene family of seven *Rosacea* species.

|           |            |        |          |         |           |           |                 |
|-----------|------------|--------|----------|---------|-----------|-----------|-----------------|
| MdBBX1    | .. REARVLR | RYEKRN | NRKFEKTI | RYASRK  | AYAETRPRI | KG        | 38              |
| MdBBX2    | ..         |        | FCKTI    | RYASRK  | AYAETRPRI | KG        | 22              |
| MdBBX14   | .. REARVSR | RYEKRR | TRLFSK   | KI RYEV | RKLN      | AEKRP     | RMKG            |
| MdBBX20   | .. REARVLR | RYEKKK | TRKFEK   | TI RYAS | RK        | AYAETRPRI | KG              |
| MdBBX23   | .. RDKAKM  | RYEK   | KKTRTF   | GKCI    | RYAS      | RK        | ARADTRKRVK      |
| MdBBX24   | .. RSNAMR  | RYEK   | KKARKF   | EKRV    | RYAS      | RK        | ARADV           |
| MdBBX29   | .. RETAL   | SRYKE  | KKTRR    | YEKHI   | RYES      | RK        | VRAESRTRI       |
| MdBBX32   | .. REARVSR | RYEKRR | TRLFSK   | KI RYEV | RKLN      | AEKRP     | RMKG            |
| MdBBX33   | .. REARVSR | RYEKRR | TRLFSK   | KI RYEV | RKLN      | AEKRP     | RMKG            |
| MdBBX37   | .. RCNAML  | RYKE   | KKTRR    | YDKHI   | RYES      | RK        | ARADTRKRVK      |
| MdBBX38   | .. RCNAML  | RYKE   | KKTRR    | YEKHI   | RYES      | RK        | ARADTRM         |
| MdBBX43   | .. REARVSR | RYEKRR | TRLFSK   | KI RYEV | RKLN      | AEKRP     | RMKG            |
| MdBBX44   | .. REARVSR | RYEKRR | TRLFSK   | KI RYEV | RKLN      | AEKRP     | RMKG            |
| MdBBX45   | .. REARVLR | RYEKRN | NRKFEK   | TI RYAS | RK        | AYAETRPRI | KG              |
| MdBBX46   | .. REARVLR | RYEK   | KKTRK    | FEKTI   | RYAS      | RK        | AYAETRPRI       |
| MdBBX47   | .. REARVLR | RYEK   | KKTRK    | FEKTI   | RYAS      | RK        | AYAETRPRI       |
| MdBBX48   | .. REARVLR | RYEK   | KKTRK    | FEKTI   | RYAS      | RK        | AYAETRPRI       |
| MdBBX51   | .. RSNAMR  | RYEK   | KKARKF   | EKRV    | RYAS      | RK        | ARADV           |
| FvBBX3    | .. RESAL   | TRYKE  | KKTRR    | YCNLI   | NSG       | SR        | RFV             |
| FvBBX5    | .. REARVLR | RYEKRN | NRKFEK   | TI RYAS | RK        | AYAETRPRI | KG              |
| FvBBX11   | .. RCNAML  | RYKE   | KKNRR    | YDKHI   | RYES      | RK        | ARADTRKRVK      |
| FvBBX13   | .. RANSL   | MRYKE  | KKQSRL   | TEK     | FP        | PY        | SPRKATVDVHRRGRG |
| FvBBX14   | .. REARVSR | RYEKRR | TRLFSK   | KI RYEV | RKLN      | AEKRP     | RMKG            |
| FvBBX15   | .. REARVSR | RYEKRR | TRLFSK   | KI RYEV | RKLN      | AEKRP     | RMKG            |
| FvBBX18   | .. RSNAMR  | RYEK   | KKARKF   | EKRV    | RYAS      | RK        | ARADV           |
| FvBBX19   | .. RDKAKM  | RYE    | EKKTR    | TFGK    | CI        | RYAS      | RK              |
| PcBBX1    | .. REARVSR | RYEKRR | TRLFSK   | KI RYEV | RKLN      | AEKRP     | RMKG            |
| PcBBX3    | .. REARVLR | RYEKRN | NRKFEK   | TI RYAS | RK        | AYAETRPRI | KG              |
| PcBBX8    | .. RETAL   | SRYKE  | KKTRR    | YEKHI   | RYES      | RK        | VRAESRTRI       |
| PcBBX9    | .. RCNAML  | RYKE   | KKTRR    | YDKHI   | RYES      | RK        | ARADTRKRVK      |
| PcBBX10   | .. REARVLR | RYEK   | KKTRK    | FEKTI   | RYAS      | RK        | AYAETRPRI       |
| PcBBX16   | .. RSNAMR  | RYEK   | KKARKF   | EKRV    | RYAS      | RK        | ARADV           |
| PcBBX17   | .. REARVLR | RYEK   | KKTRK    | FEKTI   | RYAS      | RK        | AYAETRPRI       |
| PcBBX18   | .. RDKAKM  | RYE    | EKKTR    | TFGK    | CI        | RYAS      | RK              |
| PcBBX23   | .. RSNAMR  | RYEK   | KKARKF   | EKRV    | RYAS      | RK        | ARADV           |
| PcBBX25   | .. RCNAML  | RYKE   | KKTRR    | YDKHI   | RYES      | RK        | ARADTRKRVK      |
| PcBBX29   | .. REARVLR | RYEKRN | NRKFEK   | TI RYAS | RK        | AYAETRPRI | KG              |
| PcBBX30   | .. RVARVLR | RYEKRN | NRKFEK   | TI RYAS | RK        | AYAETRPRI | KG              |
| PcBBX33   | .. REARVSR | RYEKRR | TRLFSK   | KI RYEV | RKLN      | AEKRP     | RMKG            |
| PcBBX35   | .. REARVSR | RYEKRR | TRLFSK   | KI RYEV | RKLN      | AEKRP     | RMKG            |
| PcBBX37   | .. REARVSR | RYEKRR | TRLFSK   | KI RYEV | RKLN      | AEKRP     | RMKG            |
| RcBBX1    | .. RSNAMR  | RYEK   | KKARKF   | EKRV    | RYAS      | RK        | ARADV           |
| RcBBX2    | .. REARVM  | RYEKRN | NRKFEK   | TI RYAS | RK        | AYAETRPRI | KG              |
| RcBBX8    | .. RDKAKM  | RYE    | EKKTR    | TFGK    | CI        | RYAS      | RK              |
| RcBBX11   | .. REARVLR | RYEK   | KKTRK    | FEKTI   | RYAS      | RK        | AYAETRPRI       |
| RcBBX12   | ..         | MRYKE  | KKHSRL   | TEK     | KL        | PY        | PSRKATTINIHKL   |
| RcBBX14   | .. RAKAN   | I RYKE | KKRS     | RS      | SHAK      | TI RY     | PNRKARA         |
| RcBBX15   | .. REARVSR | RYEKRR | TRLFSK   | KI RYEV | RKLN      | AEKRP     | RMKG            |
| RcBBX19   | .. REARVLR | RYEKRN | NRKFEK   | TI RYAS | RK        | AYAETRPRI | KG              |
| RcBBX22   | .. REARVSR | RYEKRR | TRLFSK   | KI RYEV | RKLN      | AEKRP     | RMKG            |
| PaBBX3    | .. RCNAML  | RYKE   | KKTRR    | YDKHI   | RYES      | RK        | ARADTRKRI       |
| PaBBX4    | .. REARVSR | RYEKRR | TRLFSK   | KI RYEV | RKLN      | AEKRP     | RMKG            |
| PaBBX6    | .. REARVLR | RYEKRN | NRKFEK   | TI RYAS | RK        | AYAETRPRI | KG              |
| PaBBX7    | .. RI      | ASL    | VR       | FR      | EKR       | KER       | CFD             |
| PaBBX10   | .. RSNAMR  | RYEK   | KKARKF   | EKRV    | RYAS      | RK        | ARADV           |
| PaBBX11   | .. RDKAKM  | RYE    | EKKTR    | TY      |           |           |                 |
| PaBBX14   | .. REARVLR | RYEK   | KKTRK    | FEKTI   | RYAS      | RK        | AYAETRPRI       |
| PaBBX15   | .. HMPK    | CDI    | CQE      | AV      | GY        | FF        | CLE             |
| PaBBX18   | .. REARVSR | RYEKRR | TRLFSK   | KI RYEV | RKLN      | AEKRP     | RMKG            |
| PaBBX22   | .. RETAL   | SRYK   | AKKTRR   | YEKHI   | RYES      | RK        | VRAESRTRI       |
| RoBBX3    | .. REARVLR | RYEKRN | NRKFEK   | TI RYAS | RK        | AYAETRPRI | KG              |
| RoBBX5    | .. RESAL   | TRYKE  | KKTRR    | YDKHI   | RYES      | RK        | VRAESRTRI       |
| RoBBX8    | .. REARVSR | RYEKRR | TRLFSK   | KI RYEV | RKLN      | AEKRP     | RMKG            |
| RoBBX11   | .. RDKAKM  | RYE    | EKKTR    | TFGK    | CI        | RYAS      | RK              |
| RoBBX14   | .. RCNAML  | RYKE   | KKNRR    | YDKHI   | RYES      | RK        | ARADTRKRVK      |
| RoBBX17   | .. REARVM  | RYEKRN | NRKFEK   | TI RYAS | RK        | AYAETRPRI | KG              |
| RoBBX19   | .. REARVSR | RYEKRR | TRLFSK   | KI RYEV | RKLN      | AEKRP     | RMKG            |
| RoBBX20   | .. REARVLR | RYEK   | KKTRK    | FEKTI   | RYAS      | RK        | AYAETRPRI       |
| PpBBX8    | .. REARVSR | RYEKRR | TRLFSK   | KI RYEV | RKLN      | AEKRP     | RMKG            |
| PpBBX9    | .. REARVSR | RYEKRR | TRLFSK   | KI RYEV | RKLN      | AEKRP     | RMKG            |
| PpBBX11   | .. RDKAKM  | RYE    | EKKTR    | TFGK    | CI        | RYAS      | RK              |
| PpBBX14   | .. RCNAML  | RYKE   | KKTRR    | YDKHI   | RYES      | RK        | ARADTRKRVK      |
| PpBBX15   | .. REARVSR | RYEKRR | TRLFSK   | KI RYEV | RKLN      | AEKRP     | RMKG            |
| PpBBX16   | .. RSNAMR  | RYEK   | KKARKF   | EKRV    | RYAS      | RK        | ARADV           |
| PpBBX17   | .. RETAL   | SRYKE  | KKTRR    | YEKHI   | RYES      | RK        | VRAESRTRI       |
| PpBBX18   | .. REARVLR | RYEKRN | NRKFEK   | TI RYAS | RK        | AYAETRPRI | KG              |
| PpBBX19   | .. REARVLR | RYEK   | KKTRK    | FEKTI   | RYAS      | RK        | AYAETRPRI       |
| PpBBX20   | .. REARVLR | RYEKRN | NRKFEK   | TI RYAS | RK        | AYAETRPRI | KG              |
| Consensus | ..         |        |          |         |           |           |                 |

**Figure S2:** Structures of the BBX proteins. The length and order of the domains represent their actual location within each protein.

| Name    | Domains  | BBX1    | BBX2   | CCT     | Protein structure |
|---------|----------|---------|--------|---------|-------------------|
| MdBBX1  | 1BBX+CCT | 3-36    |        | 252-293 |                   |
| MdBBX2  | 2BBX+CCT | 19-61   | 67-104 | 350-377 |                   |
| MdBBX3  | 1BBX     | 51-76   |        |         |                   |
| MdBBX4  | 1BBX     | 10,35   |        |         |                   |
| MdBBX5  | 1BBX     | 57-97   |        |         |                   |
| MdBBX6  | 1BBX     | 139-186 |        |         |                   |
| MdBBX7  | 1BBX     | 1-45    |        |         |                   |
| MdBBX8  | 1BBX     | 1-45    |        |         |                   |
| MdBBX9  | 1BBX     | 1-45    |        |         |                   |
| MdBBX10 | 1BBX     | 5-47    |        |         |                   |
| MdBBX11 | 2BBX     | 2-45    | 84-108 |         |                   |
| MdBBX12 | 1BBX     | 2-45    |        |         |                   |
| MdBBX13 | 1BBX     | 4-45    |        |         |                   |
| MdBBX14 | 1BBX+CCT | 23-65   |        | 377-419 |                   |
| MdBBX15 | 2BBX     | 17-63   | 70-92  |         |                   |
| MdBBX16 | 1BBX     | 28-54   |        |         |                   |
| MdBBX17 | 1BBX     | 19-66   |        |         |                   |
| MdBBX18 | 1BBX     | 19-66   |        |         |                   |
| MdBBX19 | 2BBX     | 5-47    | 53-100 |         |                   |
| MdBBX20 | 2BBX+CCT | 16-49   | 58-105 | 323-365 |                   |
| MdBBX21 | 1BBX     | 4-45    |        |         |                   |
| MdBBX22 | 1BBX     | 4-45    |        |         |                   |
| MdBBX23 | 1BBX+CCT | 2-47    |        | 400-443 |                   |
| MdBBX24 | 2BBX+CCT | 4-47    | 47-90  | 356-399 |                   |
| MdBBX25 | 1BBX     | 5-47    |        |         |                   |
| MdBBX26 | 2BBX     | 5-47    | 51-97  |         |                   |
| MdBBX27 | 2BBX     | 4-47    | 56-100 |         |                   |
| MdBBX28 | 2BBX     | 1-48    | 45-91  |         |                   |
| MdBBX29 | 2BBX+CCT | 14-60   | 57-92  | 287-330 |                   |
| MdBBX30 | 2BBX     | 5-47    | 53-100 |         |                   |
| MdBBX31 | 1BBX     | 3-35    |        |         |                   |
| MdBBX32 | 1BBX+CCT | 16-61   |        | 399-441 |                   |
| MdBBX33 | 1BBX+CCT | 16-61   |        | 399-441 |                   |
| MdBBX34 | 1BBX     | 16-61   |        |         |                   |
| MdBBX35 | 1BBX     | 16-61   |        |         |                   |

|                |          |         |         |         |  |
|----------------|----------|---------|---------|---------|--|
| <b>MdBBX36</b> | 2BBX     | 5-47    | 51-97   |         |  |
| <b>MdBBX37</b> | 2BBX+CCT | 10-56   | 56-99   | 335-377 |  |
| <b>MdBBX38</b> | 2BBX+CCT | 10-56   | 56-99   | 436-505 |  |
| <b>MdBBX39</b> | 2BBX     | 26-56   | 97-140  |         |  |
| <b>MdBBX40</b> | 1BBX     | 8-49    |         |         |  |
| <b>MdBBX41</b> | 1BBX     | 429-474 |         |         |  |
| <b>MdBBX42</b> | 1BBX     | 278-307 |         |         |  |
| <b>MdBBX43</b> | 1BBX+CCT | 146-191 |         | 528-571 |  |
| <b>MdBBX44</b> | 1BBX+CCT | 16-61   |         | 398-441 |  |
| <b>MdBBX45</b> | 2BBX+CCT | 59-104  | 110-147 | 394-436 |  |
| <b>MdBBX46</b> | 2BBX+CCT | 17-62   | 68-105  | 324-366 |  |
| <b>MdBBX47</b> | 2BBX+CCT | 17-62   | 68-105  | 324-366 |  |
| <b>MdBBX48</b> | 1BBX+CCT | 18-39   |         | 206-248 |  |
| <b>MdBBX49</b> | 1BBX     | 76-117  |         |         |  |
| <b>MdBBX50</b> | 1BBX     | 4-45    |         |         |  |
| <b>MdBBX51</b> | 2BBX+CCT | 4-47    | 47-82   | 90-93   |  |
| <b>MdBBX52</b> | 1BBX     | 8-49    |         |         |  |
| <b>MdBBX53</b> | 1BBX     | 21-58   |         |         |  |
| <b>MdBBX54</b> | 2BBX     | 2-33    | 54-96   |         |  |
| <b>MdBBX55</b> | 2BBX     | 5-34    | 55-100  |         |  |
| <b>MdBBX56</b> | 2BBX     | 5-34    | 91-122  |         |  |
| <b>MdBBX57</b> | 1BBX     | 1-35    |         |         |  |
| <b>MdBBX58</b> | 2BBX     | 287-321 | 329-353 |         |  |
| <b>MdBBX59</b> | 2BBX     | 5-47    | 53-98   |         |  |
| <b>MdBBX60</b> | 2BBX     | 2-47    | 49-77   |         |  |
| <b>MdBBX61</b> | 1BBX     | 1-45    |         |         |  |
| <b>MdBBX62</b> | 2BBX     | 1-48    | 45-91   |         |  |
| <b>MdBBX63</b> | 2BBX     | 1-48    | 45-91   |         |  |
| <b>MdBBX64</b> | 1BBX     | 19-66   |         |         |  |
| <b>MdBBX65</b> | 1BBX     | 5-47    |         |         |  |
| <b>MdBBX66</b> | 1BBX     | 5-34    |         |         |  |
| <b>MdBBX67</b> | 1BBX     | 13-47   |         |         |  |
| <b>PcBBX1</b>  | 1BBX+CCT | 17-57   |         | 397-440 |  |
| <b>PcBBX2</b>  | 1BBX     | 3-35    |         |         |  |
| <b>PcBBX3</b>  | 2BBX+CCT | 5-58    | 44-91   | 279-321 |  |
| <b>PcBBX4</b>  | 1BBX     | 1-45    |         |         |  |
| <b>PcBBX5</b>  | 1BBX     | 6-49    |         |         |  |
| <b>PcBBX6</b>  | 2BBX     | 3-47    | 53-100  |         |  |
| <b>PcBBX7</b>  | 1BBX     | 1-45    |         |         |  |
| <b>PcBBX8</b>  | 2BBX+CCT | 14-60   | 60-89   | 343-386 |  |
| <b>PcBBX9</b>  | 2BBX+CCT | 10-56   | 56-99   | 439-481 |  |

|                |          |       |        |         |                                                                                       |
|----------------|----------|-------|--------|---------|---------------------------------------------------------------------------------------|
| <b>PcBBX10</b> | 2BBX+CCT | 16-52 | 58-105 | 309-371 |    |
| <b>PcBBX11</b> | 1BBX     | 7-35  | 55-97  |         |    |
| <b>PcBBX12</b> | 1BBX     | 3-35  |        |         |    |
| <b>PcBBX13</b> | 1BBX     | 2-47  |        |         |    |
| <b>PcBBX14</b> | 2BBX     | 2-40  | 43-88  |         |    |
| <b>PcBBX15</b> | 1BBX     | 4-45  |        |         |    |
| <b>PcBBX16</b> | 2BBX+CCT | 4-47  | 47-90  | 356-399 |    |
| <b>PcBBX17</b> | 2BBX+CCT | 18-62 | 58-105 | 289-331 |    |
| <b>PcBBX18</b> | 2BBX+CCT | 2-47  | 47-81  | 402-445 |    |
| <b>PcBBX19</b> | 1BBX     | 1-31  |        |         |    |
| <b>PcBBX20</b> | 2BBX     | 3-47  | 53-100 |         |    |
| <b>PcBBX21</b> | 1BBX     | 2-45  |        |         |    |
| <b>PcBBX22</b> | 2BBX     | 5-47  | 51-97  |         |    |
| <b>PcBBX23</b> | 2BBX+CCT | 4-47  | 47-90  | 356-399 |    |
| <b>PcBBX24</b> | 2BBX     | 4-45  | 53-98  |         |    |
| <b>PcBBX25</b> | 2BBX+CCT | 10-56 | 56-99  | 434-476 |    |
| <b>PcBBX26</b> | 1BBX     | 6-49  |        |         |    |
| <b>PcBBX27</b> | 1BBX     | 4-45  |        |         |    |
| <b>PcBBX28</b> | 1BBX     | 4-31  |        |         |    |
| <b>PcBBX29</b> | 2BBX+CCT | 18-61 | 57-104 | 335-378 |   |
| <b>PcBBX30</b> | 2BBX+CCT | 4-47  | 53-99  | 279-321 |  |
| <b>PcBBX31</b> | 2BBX     | 5-48  | 45-91  |         |  |
| <b>PcBBX32</b> | 2BBX     | 5-47  | 55-100 |         |  |
| <b>PcBBX33</b> | 1BBX+CCT | 17-61 |        | 362-404 |  |
| <b>PcBBX34</b> | 1BBX     | 18-56 | 52-99  |         |  |
| <b>PcBBX35</b> | 1BBX+CCT | 19-61 |        | 372-421 |  |
| <b>PcBBX36</b> | 1BBX     | 2-45  |        |         |  |
| <b>PcBBX37</b> | 1BBX     | 17-61 |        |         |  |
| <b>PcBBX38</b> | 2BBX     | 2-33  | 53-99  |         |  |
| <b>PcBBX39</b> | 2BBX     | 5-47  | 55-100 |         |  |
| <b>PcBBX40</b> | 1BBX     | 2-47  |        |         |  |
| <b>RcBBX1</b>  | 2BBX+CCT | 5-47  | 47-90  | 358-401 |  |
| <b>RcBBX2</b>  | 2BBX+CCT | 16-59 | 59-102 | 285-327 |  |
| <b>RcBBX3</b>  | 2BBX     | 5-47  | 53-96  |         |  |
| <b>RcBBX4</b>  | 2BBX     | 2-45  | 52-96  |         |  |
| <b>RcBBX5</b>  | 1BBX     | 46-63 |        |         |  |
| <b>RcBBX6</b>  | 2BBX     | 21-62 | 73-116 |         |  |
| <b>RcBBX7</b>  | 1BBX     | 4-47  |        |         |  |
| <b>RcBBX8</b>  | 1BBX+CCT | 1-43  |        | 394-437 |  |
| <b>RcBBX9</b>  | 1BBX     | 21-48 |        |         |  |
| <b>RcBBX10</b> | 1BBX     | 4-45  |        |         |  |



|                |          |         |         |         |  |
|----------------|----------|---------|---------|---------|--|
| <b>RcBBX11</b> | 2BBX+CCT | 18-62   | 58-105  | 225-267 |  |
| <b>RcBBX12</b> | 2BBX+CCT | 5-39    | 43-78   | 401-439 |  |
| <b>RcBBX13</b> | 1BBX     | 1-47    |         |         |  |
| <b>RcBBX14</b> | 1BBX+CCT | 4-44    |         | 307-347 |  |
| <b>RcBBX15</b> | 1BBX+CCT | 25-69   |         | 384-426 |  |
| <b>RcBBX16</b> | 2BBX     | 5-47    | 51-97   |         |  |
| <b>RcBBX17</b> | 1BBX     | 4-45    |         |         |  |
| <b>RcBBX18</b> | 2BBX     | 4-47    | 56-100  |         |  |
| <b>RcBBX19</b> | 2BBX+CCT | 21-67   | 67-109  | 345-386 |  |
| <b>RcBBX20</b> | 2BBX     | 72-119  | 115-164 |         |  |
| <b>RcBBX21</b> | 2BBX     | 5-47    | 54-100  |         |  |
| <b>RcBBX22</b> | 1BBX+CCT | 71-115  |         | 442-484 |  |
| <b>PaBBX1</b>  | 2BBX     | 5-47    | 53-98   |         |  |
| <b>PaBBX2</b>  | 2BBX     | 19-62   | 58-100  |         |  |
| <b>PaBBX3</b>  | 2BBX+CCT | 9-56    | 56-99   | 443-485 |  |
| <b>PaBBX4</b>  | 2BBX+CCT | 17-61   | 43-90   | 395-437 |  |
| <b>PaBBX5</b>  | 1BBX     | 5-47    |         |         |  |
| <b>PaBBX6</b>  | 2BBX+CCT | 5-72    | 44-91   | 282-324 |  |
| <b>PaBBX7</b>  | 1BBX     | 202-259 |         |         |  |
| <b>PaBBX8</b>  | 1BBX     | 4-35    |         |         |  |
| <b>PaBBX9</b>  | 1BBX     | 5-44    |         |         |  |
| <b>PaBBX10</b> | 2BBX+CCT | 5-47    | 47-90   | 407-441 |  |
| <b>PaBBX11</b> | 1BBX     | 2-47    |         |         |  |
| <b>PaBBX12</b> | 1BBX     | 24-51   |         |         |  |
| <b>PaBBX13</b> | 1BBX     | 4-45    |         |         |  |
| <b>PaBBX14</b> | 2BBX+CCT | 17-61   | 57-100  | 255-297 |  |
| <b>PaBBX15</b> | 1BBX+CCT | 2-46    |         | 51-97   |  |
| <b>PaBBX16</b> | 1BBX     | 5-47    |         |         |  |
| <b>PaBBX17</b> | 1BBX     | 1-45    |         |         |  |
| <b>PaBBX18</b> | 1BBX+CCT | 17-61   |         | 140-452 |  |
| <b>PaBBX19</b> | 2BBX     | 2-45    | 52-96   |         |  |
| <b>PaBBX20</b> | 1BBX     | 37-70   |         |         |  |
| <b>PaBBX21</b> | 2BBX     | 4-45    | 56-100  |         |  |
| <b>PaBBX22</b> | 2BBX+CCT | 19-66   | 66-108  | 347-390 |  |
| <b>RoBBX1</b>  | 1BBX     | 2-45    |         |         |  |
| <b>RoBBX2</b>  | 2BBX     | 5-47    | 58-100  |         |  |
| <b>RoBBX3</b>  | 2BBX+CCT | 5-48    | 44-91   | 278-320 |  |
| <b>RoBBX4</b>  | 1BBX     | 5-35    | 44-76   |         |  |
| <b>RoBBX5</b>  | 2BBX+CCT | 29-76   | 76-118  | 351-394 |  |
| <b>RoBBX6</b>  | 1BBX     | 1-45    |         |         |  |
| <b>RoBBX7</b>  | 2BBX     | 4-47    | 56-100  |         |  |

|                |          |       |        |         |  |
|----------------|----------|-------|--------|---------|--|
| <b>RoBBX8</b>  | 1BBX+CCT | 24-68 |        | 401-443 |  |
| <b>RoBBX9</b>  | 1BBX     | 4-45  |        |         |  |
| <b>RoBBX10</b> | 2BBX     | 5-47  | 51-97  |         |  |
| <b>RoBBX11</b> | 1BBX+CCT | 4-47  |        | 397-440 |  |
| <b>RoBBX12</b> | 1BBX     | 19-62 |        |         |  |
| <b>RoBBX13</b> | 2BBX     | 2-33  | 53-96  |         |  |
| <b>RoBBX14</b> | 2BBX+CCT | 14-56 | 56-99  | 431-473 |  |
| <b>RoBBX15</b> | 1BBX     | 4-45  |        |         |  |
| <b>RoBBX16</b> | 1BBX     | 1-47  |        |         |  |
| <b>RoBBX17</b> | 2BBX+CCT | 14-59 | 55100  | 292-334 |  |
| <b>RoBBX18</b> | 2BBX     | 5-47  | 52-98  |         |  |
| <b>RoBBX19</b> | 1BBX+CCT | 25-69 |        | 387-429 |  |
| <b>RoBBX20</b> | 2BBX+CCT | 17-61 | 57-104 | 327-369 |  |
| <b>PpBBX1</b>  | 1BBX     | 35-76 |        |         |  |
| <b>PpBBX2</b>  | 2BBX     | 5-47  | 55-100 |         |  |
| <b>PpBBX3</b>  | 1BBX     | 1-45  |        |         |  |
| <b>PpBBX4</b>  | 2BBX     | 5-47  | 53-98  |         |  |
| <b>PpBBX5</b>  | 2BBX     | 2-33  | 53-96  |         |  |
| <b>PpBBX6</b>  | 2BBX     | 5-47  | 56-100 |         |  |
| <b>PpBBX7</b>  | 1BBX     | 25-69 |        |         |  |
| <b>PpBBX8</b>  | 1BBX+CCT | 17-61 |        | 389-431 |  |
| <b>PpBBX9</b>  | 1BBX+CCT | 17-61 |        | 389-431 |  |
| <b>PpBBX10</b> | 1BBX     | 24-51 |        |         |  |
| <b>PpBBX11</b> | 1BBX+CCT | 2-47  |        | 395-438 |  |
| <b>PpBBX12</b> | 2BBX     | 4-45  | 56-87  |         |  |
| <b>PpBBX13</b> | 1BBX     | 4-35  |        |         |  |
| <b>PpBBX14</b> | 2BBX+CCT | 9-56  | 56-99  | 445-487 |  |
| <b>PpBBX15</b> | 1BBX+CCT | 17-61 |        | 392-434 |  |
| <b>PpBBX16</b> | 2BBX+CCT | 5-47  | 47-90  | 359-402 |  |
| <b>PpBBX17</b> | 2BBX+CCT | 19-66 | 66-108 | 347-390 |  |
| <b>PpBBX18</b> | 2BBX+CCT | 5-48  | 44-91  | 282-324 |  |
| <b>PpBBX19</b> | 2BBX+CCT | 17-61 | 57-104 | 317-359 |  |
| <b>PpBBX20</b> | 2BBX+CCT | 20-62 | 58-105 | 311-353 |  |
| <b>FvBBX1</b>  | 2BBX     | 2-45  | 52-95  |         |  |
| <b>FvBBX2</b>  | 2BBX     | 4-47  | 52-100 |         |  |
| <b>FvBBX3</b>  | 2BBX+CCT | 27-75 | 76-105 | 349-377 |  |
| <b>FvBBX4</b>  | 2BBX     | 5-47  | 57-100 |         |  |
| <b>FvBBX5</b>  | 2BBX+CCT | 8-51  | 47-94  | 251-393 |  |
| <b>FvBBX6</b>  | 1BBX     | 1-45  |        |         |  |
| <b>FvBBX7</b>  | 2BBX     | 5-45  | 53-97  |         |  |
| <b>FvBBX8</b>  | 1BBX     | 1-47  |        |         |  |

|                |          |       |        |         |                                                                                     |
|----------------|----------|-------|--------|---------|-------------------------------------------------------------------------------------|
| <b>FvBBX9</b>  | 2BBX     | 15-59 | 55-102 |         |  |
| <b>FvBBX10</b> | 2BBX     | 5-47  | 53-98  |         |  |
| <b>FvBBX11</b> | 2BBX+CCT | 9-56  | 56-99  | 430-472 |  |
| <b>FvBBX12</b> | 1BBX     | 3-39  |        |         |  |
| <b>FvBBX13</b> | 2BBX+CCT | 5-39  | 56-99  | 427-470 |  |
| <b>FvBBX14</b> | 1BBX+CCT | 25-69 |        | 393-435 |  |
| <b>FvBBX15</b> | 1BBX+CCT | 17-61 |        | 386-428 |  |
| <b>FvBBX16</b> | 1BBX     | 1-47  |        |         |  |
| <b>FvBBX17</b> | 1BBX     | 5-47  |        |         |  |
| <b>FvBBX18</b> | 2BBX+CCT | 5-47  | 47-90  | 358-401 |  |
| <b>FvBBX19</b> | 1BBX+CCT | 1-45  |        | 388-431 |  |
| <b>FvBBX20</b> | 1BBX     | 2-63  |        |         |  |
| <b>FvBBX21</b> | 1BBX     | 4-45  |        |         |  |

Listed abbreviations: B1=B-box1, B2=B-box2

**Figure S3.** The exon/intron structures and identified motifs of BBX family genes. The structure of individual *BBX* gene was obtained through the Gene Structure Display Server (<http://gsds.cbi.pku.edu.cn>) by aligning the coding or cDNA sequences with their corresponding genomic DNA sequence. 10 motifs were identified through online meme tool.

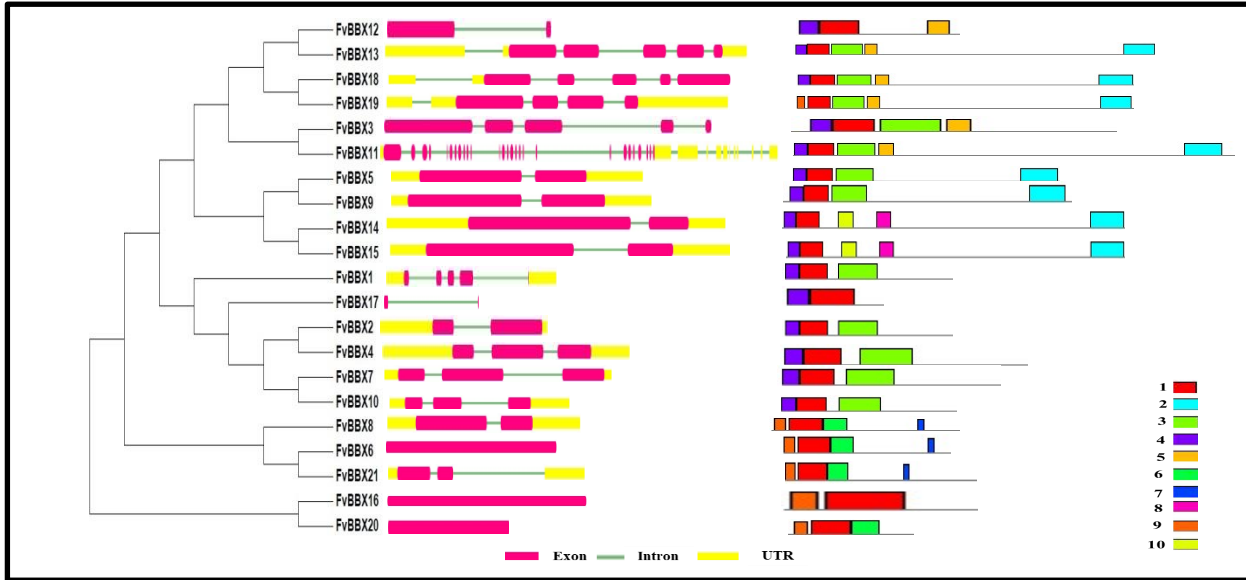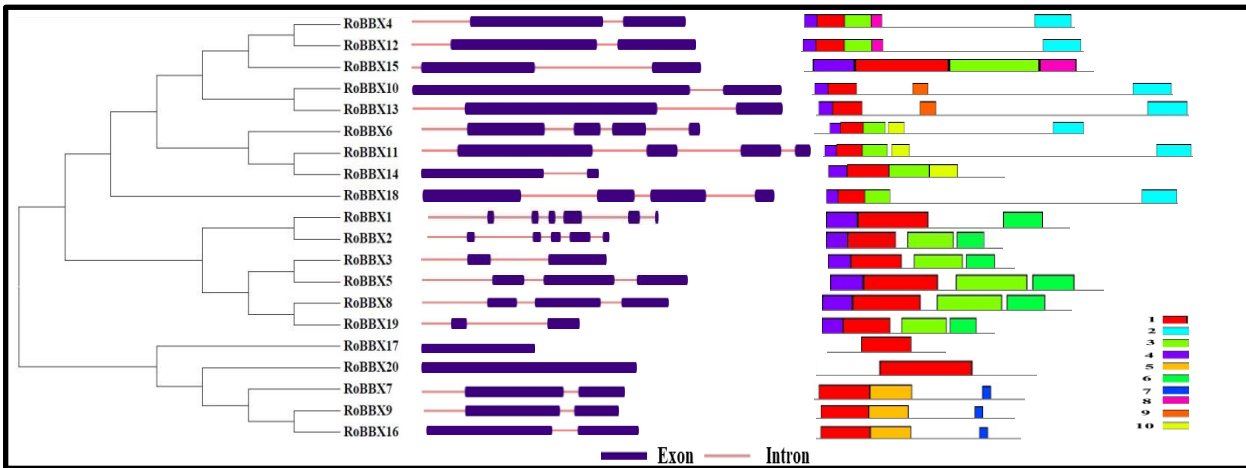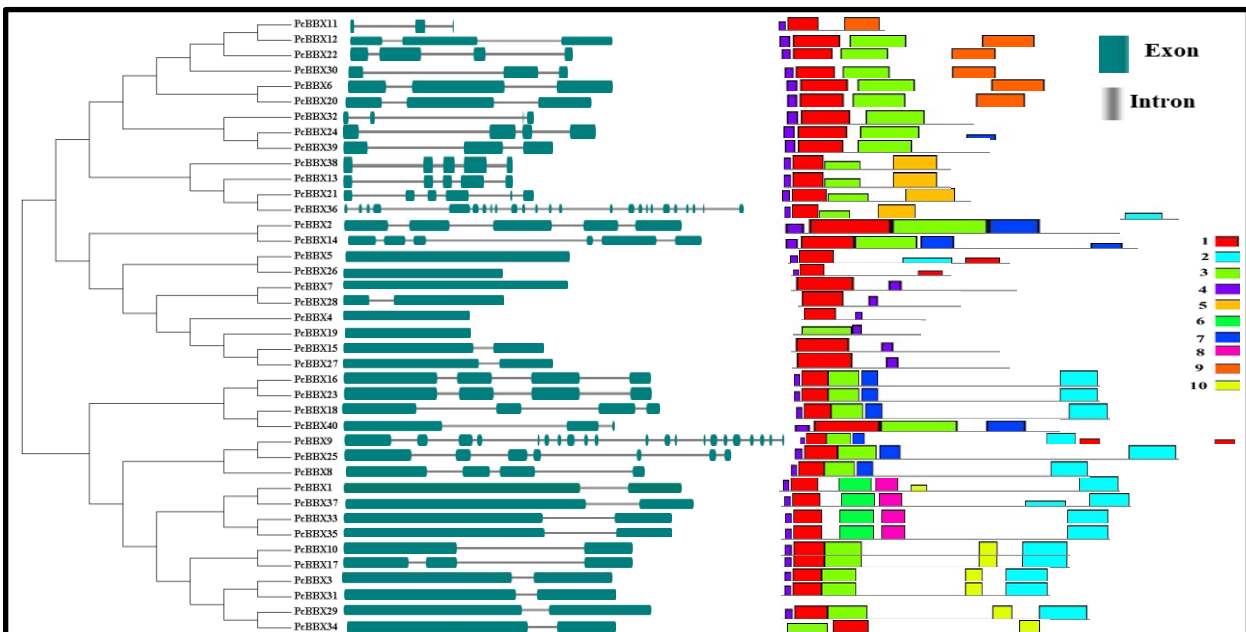

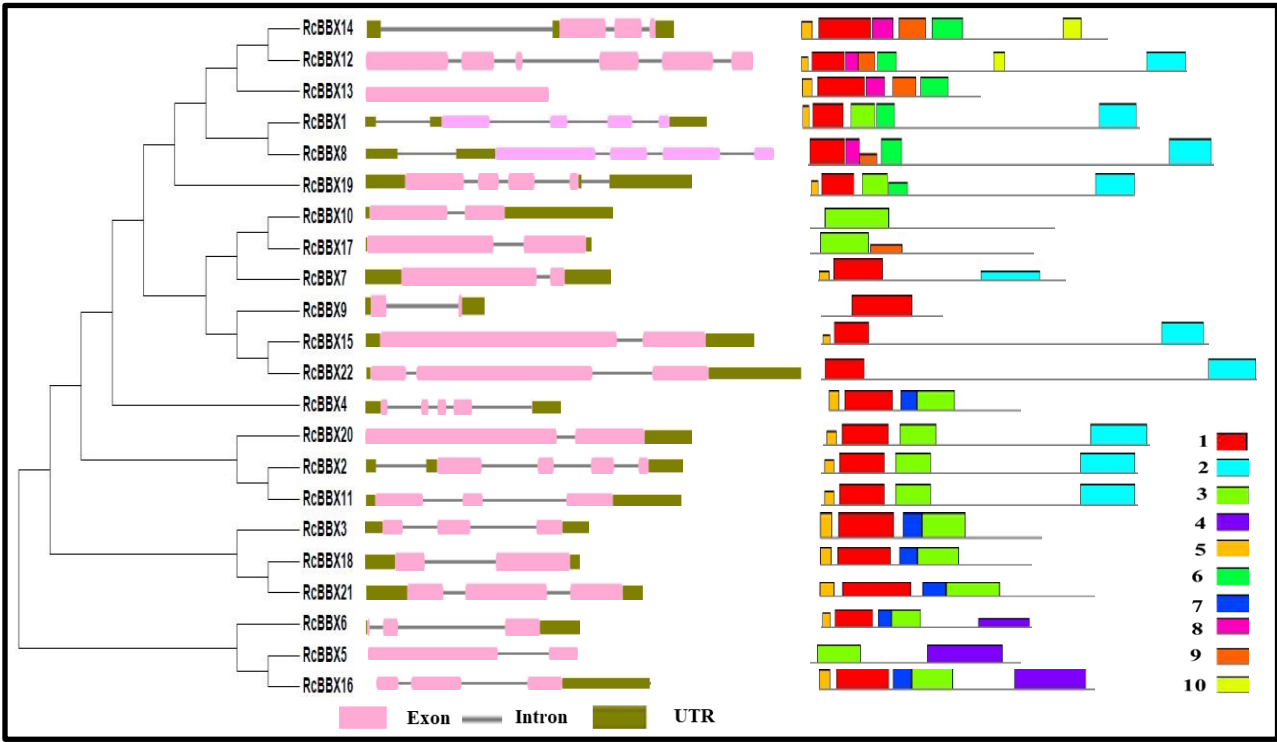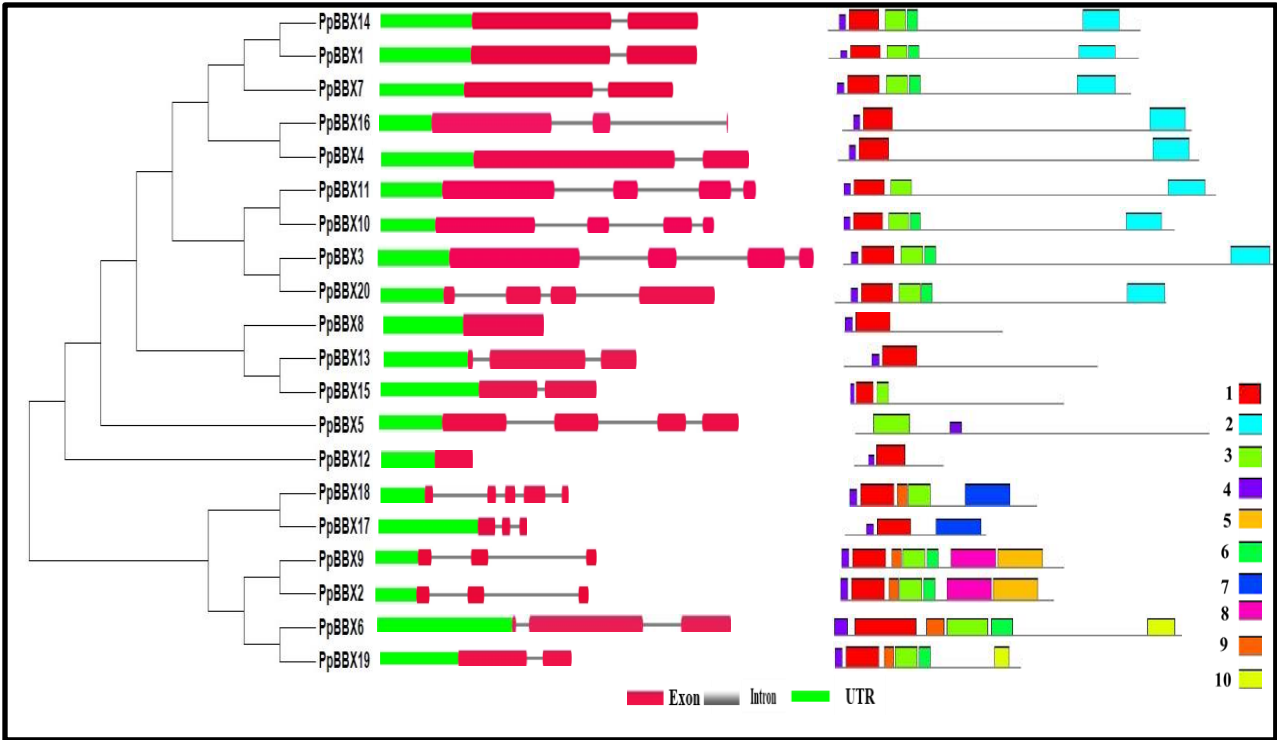

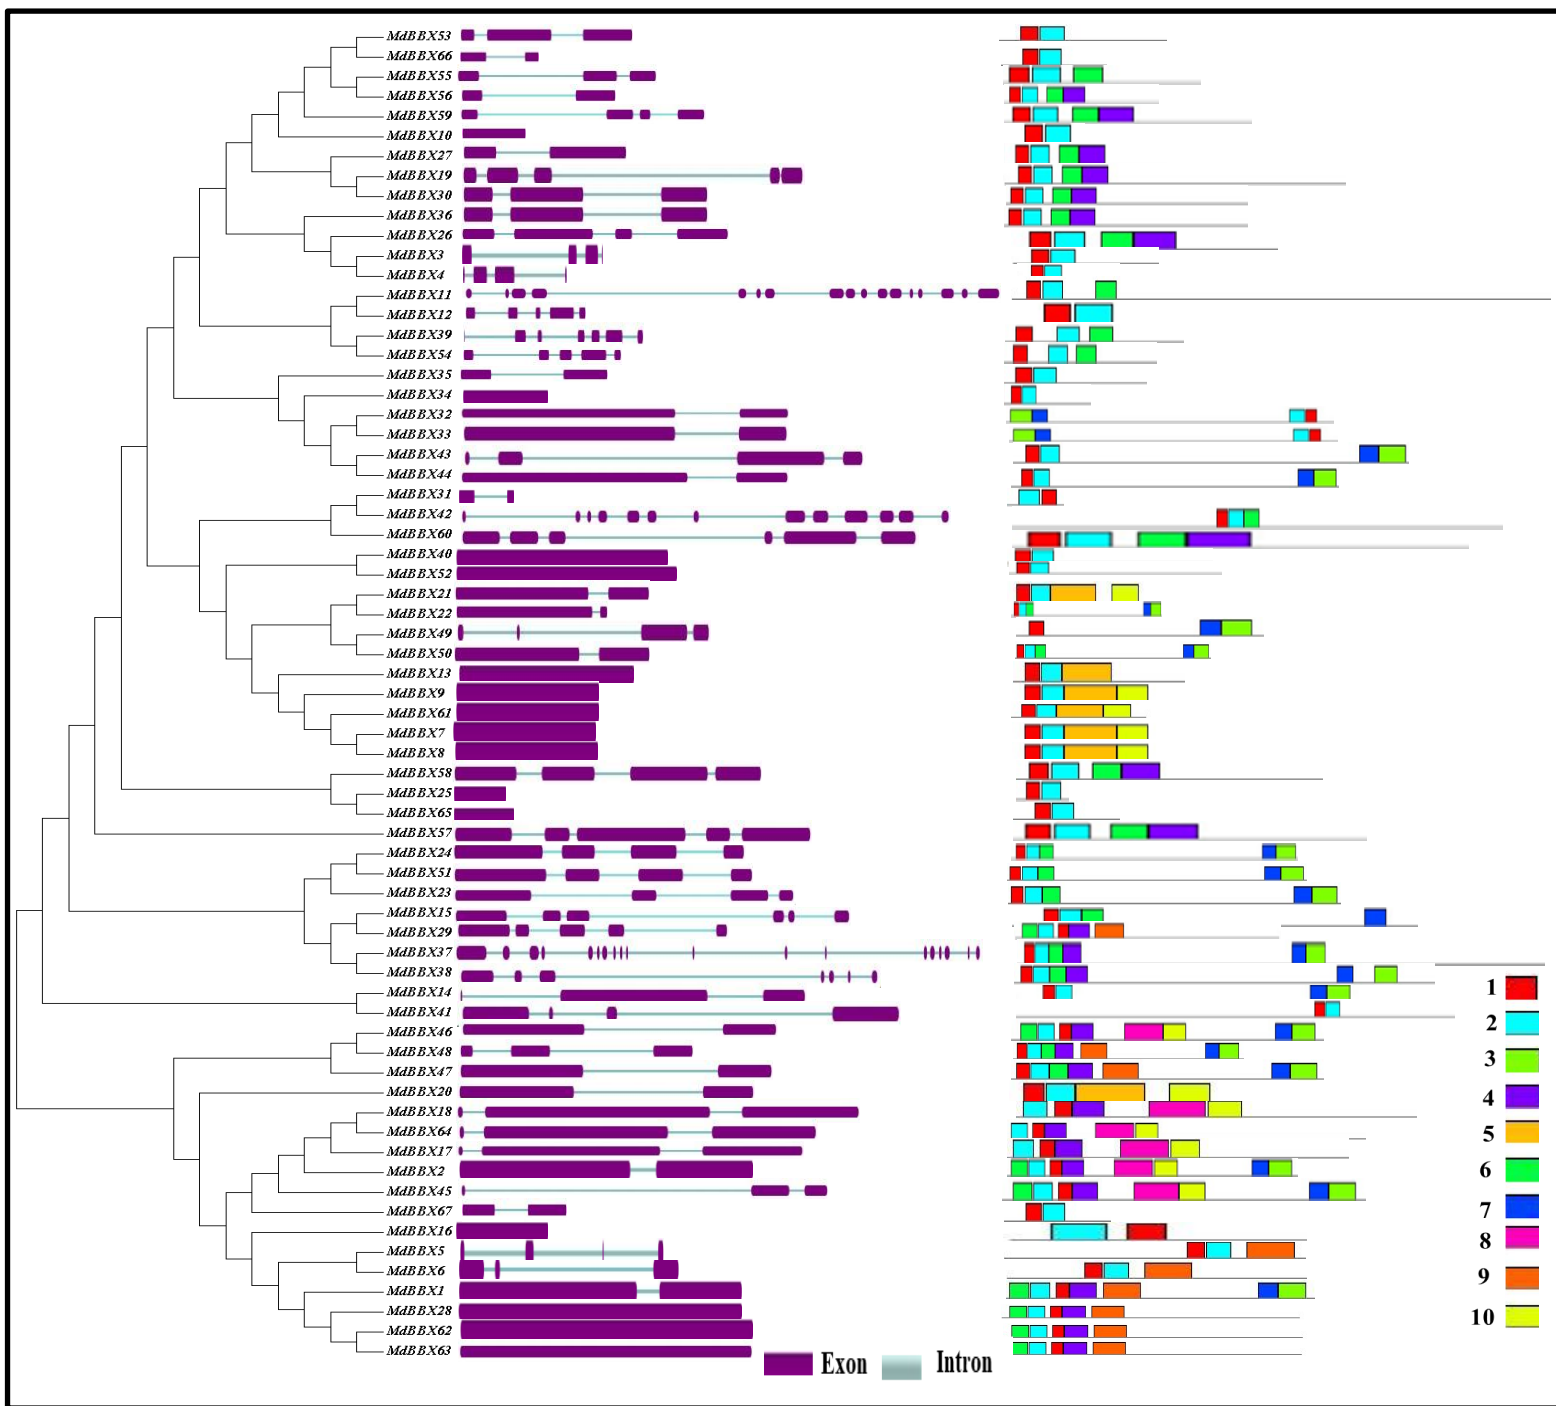

Table S3: List of primers used for qRT-PCR

| <b>Name</b>                    | <b>Id</b>     | <b>Forward Primer</b>  | <b>Reverse primer</b>   |
|--------------------------------|---------------|------------------------|-------------------------|
| BBX1                           | MDP0000202669 | CTTCTACGACTCGGTGAACTC  | CGGATTCTCCATCGCCTTG     |
| BBX7                           | MDP0000289278 | ATGAAGAAGTGCGATCTGTGT  | GATTGGCAGACATGGCAGAG    |
| BBX14                          | MDP0000271388 | TGGAGATTCAGCAGGATGTGTA | CCGCAGGAGCATTACTACTACT  |
| BBX20                          | MDP0000297093 | ATCCACTCTGCCAATCCTCTG  | GCCTCATCCTCATCTTCCTCAT  |
| BBX22                          | MDP0000198531 | TGACGACGACGACGATGAG    | CACCTCCATCACCATTGTTGAA  |
| BBX26                          | MDP0000222881 | AGGAGGAACTGGACGATTATGA | GAGTGGCAGATGTCTGGAAC    |
| BBX27                          | MDP0000800387 | TCTTCTGCTCTGCCGATGAA   | CCTGCTGTGTTTCTGTGTGT    |
| BBX30                          | MDP0000915501 | AGCATCAACCTTCAACCAAGAA | CGGAAGCGTCTCTATCAAGTAC  |
| BBX37                          | MDP0000302297 | GGTTCTGGTGCTTCTAATGACA | TCTTGCCTTCCTTGACTCGTA   |
| BBX38                          | MDP0000565292 | CCGTTCCACCATCACCGTAT   | ACAGAGAAGCATCAGGAGCAT   |
| BBX39                          | MDP0000151848 | CTAGTGATGTTCTTGTGTGA   | GGTTGAAGCCCTAGTTCCTCT   |
| BBX41                          | MDP0000273201 | AGGTTGAAGAGGAAGTTGAAGG | TCATCACCATCTGCTTGTTCCTC |
| BBX42                          | MDP0000298575 | GCGATGCGAAGGTCCATTC    | ACCTGTGTAAGTCTGATTGC    |
| BBX43                          | MDP0000321380 | TCTGCTTCCGAGCGACAT     | CCTCCTCTAACTTCACTCTACC  |
| BBX45                          | MDP0000713113 | AGAAGAGGAAGAACCGCAAGT  | GGAACGACGCCGAATTGTG     |
| BBX47                          | MDP0000298635 | TGACCAGCAGCAGCAACA     | TGTGACTTAGCGAACCATTGTA  |
| BBX49                          | MDP0000321180 | GGTGAGCCAGGACGGTAAT    | ACTATCTCCATCGCCATTGTTG  |
| BBX51                          | MDP0000782323 | CTCCCTGAAGACGATGACCTT  | CAGCAACCGCATCTTGACAA    |
| BBX52                          | MDP0000759984 | GTCGTCATCGTCGGATTGTT   | TCCATAGCATATTCCTCTTCGC  |
| <i>EF-1<math>\alpha</math></i> | DQ341381      | ATTCAAGTATGCCTGGGTGC   | CAGTCAGCCTGTGATGTTC     |
